# Supplementary material for: A Sustainable Green Enzymatic Method for Amide Bond Formation
Source: MDPI journal article supplement (doi:10.3390/molecules28155706), 2023-07-28
Supplement: s1 [file s1]

# Supplementary Information

## A sustainable green enzymatic method for amide bond formation

György Orsy <sup>1</sup>, Sayeh Shahmohammadi<sup>1,2</sup>, Enikő Forró <sup>1\*</sup>

<sup>1</sup> Institute of Pharmaceutical Chemistry, University of Szeged, Eötvös u. 6, H-6720 Szeged, Hungary; orsy.gyorgy@szte.hu (G.O.); sayeh.s@pharm.u-szeged.hu (S.S.)

<sup>2</sup> Stereochemistry Research Group, Eötvös Loránd Research Network, University of Szeged, Eötvös u. 6, Szeged, H-6720, Hungary

\* Correspondence: forro.eniko@szte.hu (E.F.); Tel.: +36-62-544964

### Contents

|                                                         |    |
|---------------------------------------------------------|----|
| 1. <sup>1</sup> H- and <sup>13</sup> C NMR spectra..... | 2  |
| 2. GC-MS measurement.....                               | 30 |

## 1. $^1\text{H}$ - and $^{13}\text{C}$ NMR spectra

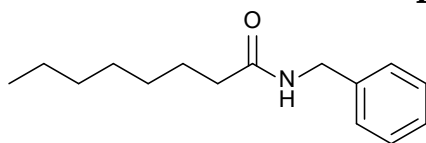

### *N*-benzyloctanamide (**12**)

The compound is obtained as a white solid in 96% yield, mp= 65.1–66.3 °C (206.0 mg, 0.883 mmol).

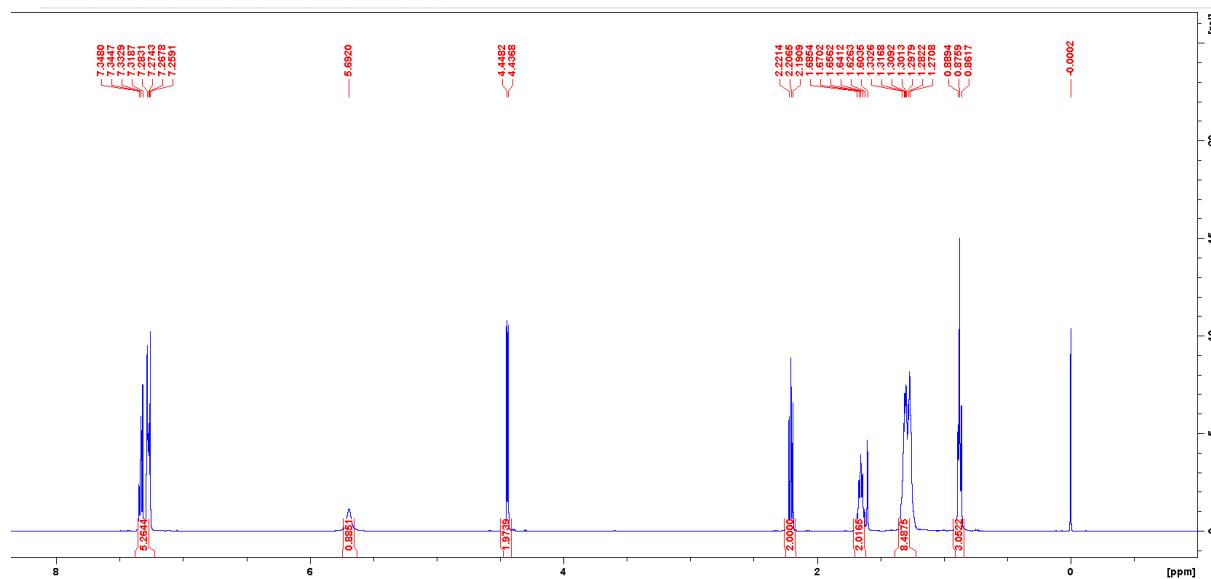

**Figure S1.**  $^1\text{H}$  NMR spectrum of *N*-benzyloctanamide (**12**) measured in Chloroform- $d$ , 99.8 atom % D at 296 K.

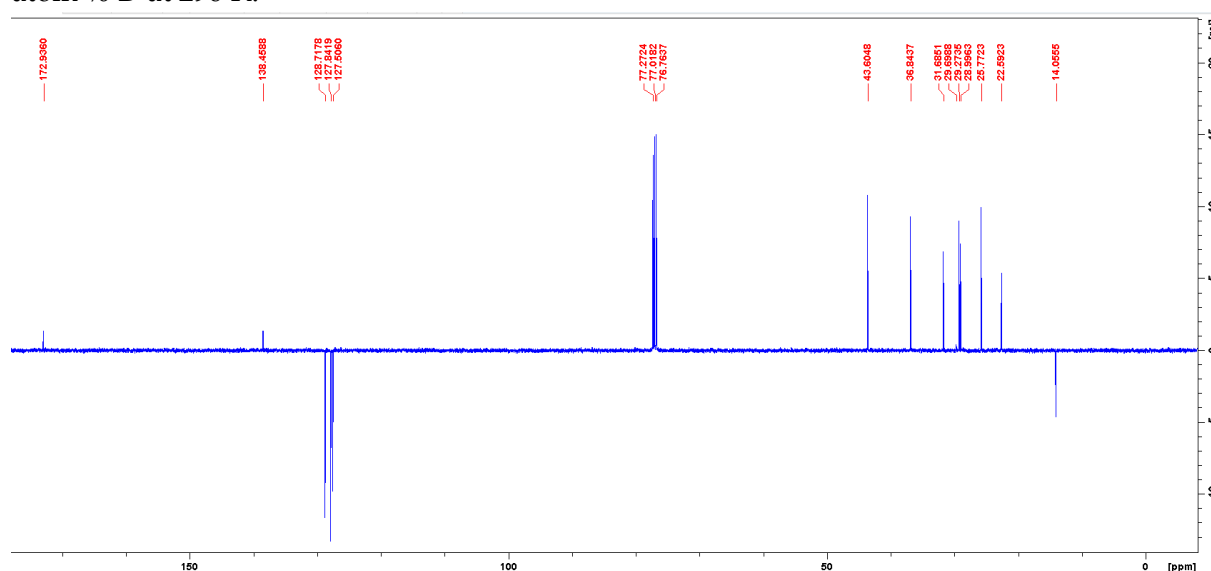

**Figure S2.** APT NMR spectrum of *N*-benzyloctanamide (**12**) measured in Chloroform- $d$ , 99.8 atom % D at 296 K.

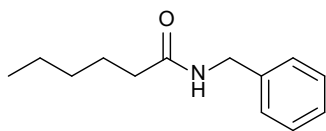

### *N*-benzylhexanamide (**13**)

The compound is obtained as a yellowish white solid in 95% yield, mp= 55.1–55.5 °C (179.3 mg, 0.874 mmol).

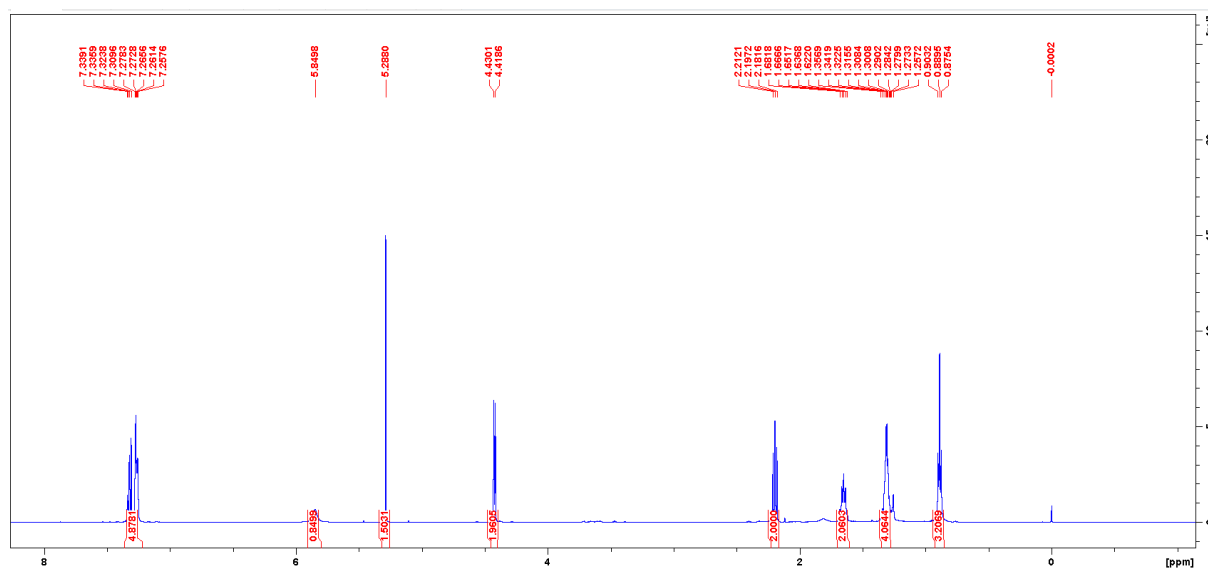

**Figure S3.**  $^1\text{H}$  NMR spectrum of *N*-benzylhexanamide (**13**) measured in Chloroform- $d$ , 99.8 atom % D at 296 K.

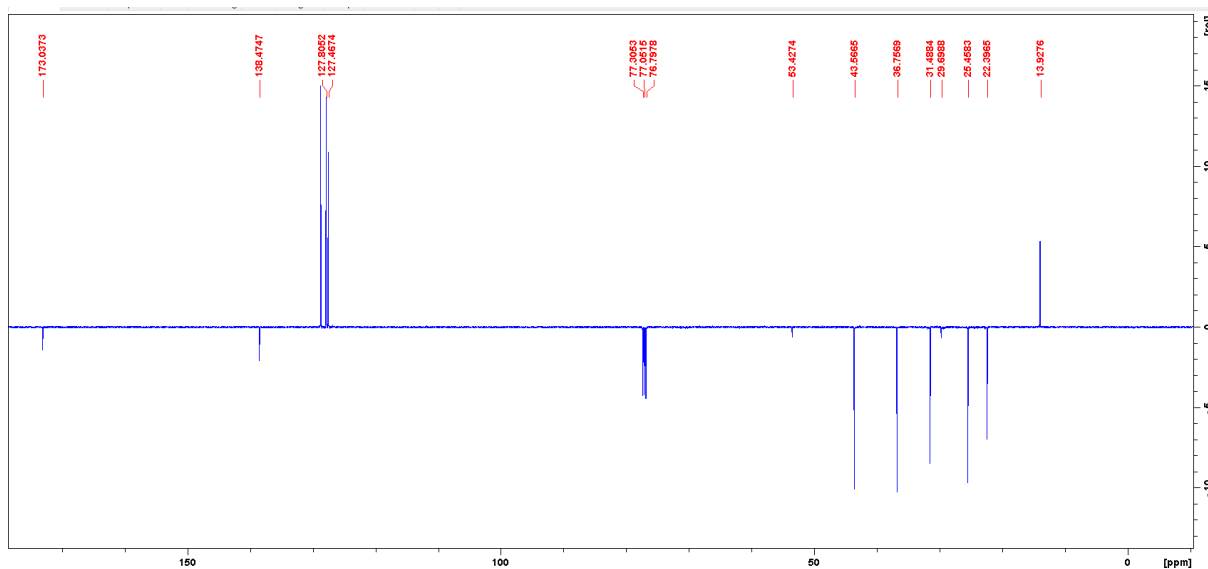

**Figure S4.** APT NMR spectrum of *N*-benzylhexanamide (**13**) measured Chloroform- $d$ , 99.8 atom % D at 296 K.

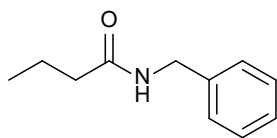

### *N*-benzylbutyramide (**14**)

The compound is obtained as a yellowish solid in 96% yield, mp= 43.0–43.6 °C (156.5 mg, 0.883 mmol).

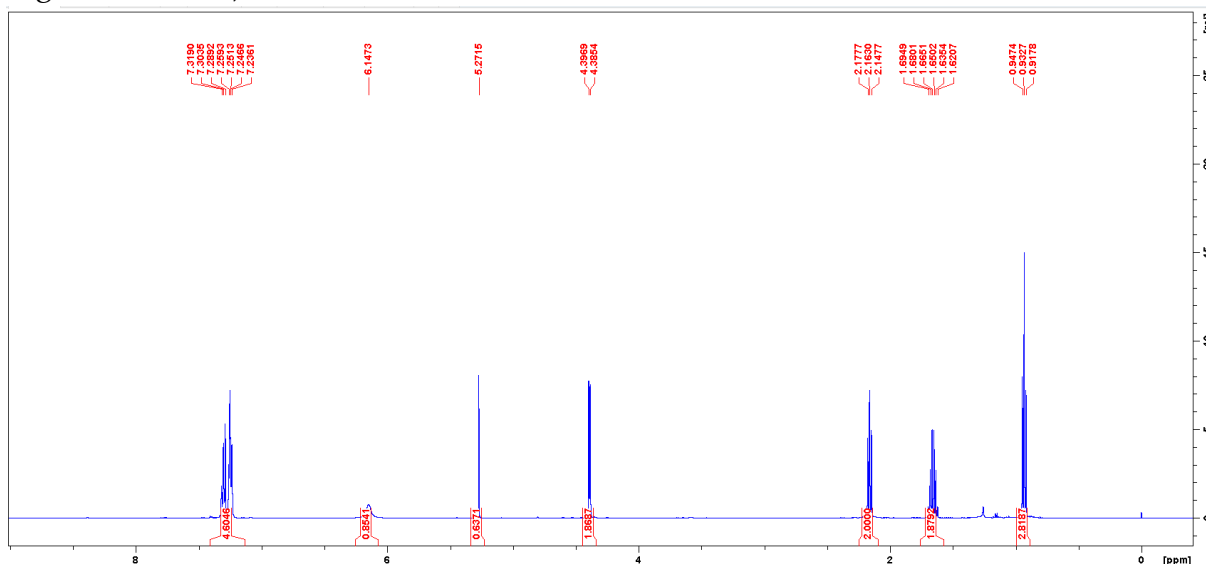

**Figure S5.**  $^1\text{H}$  NMR spectrum of *N*-benzylbutyramide (**14**) measured in Chloroform- $d$ , 99.8 atom % D at 296 K.

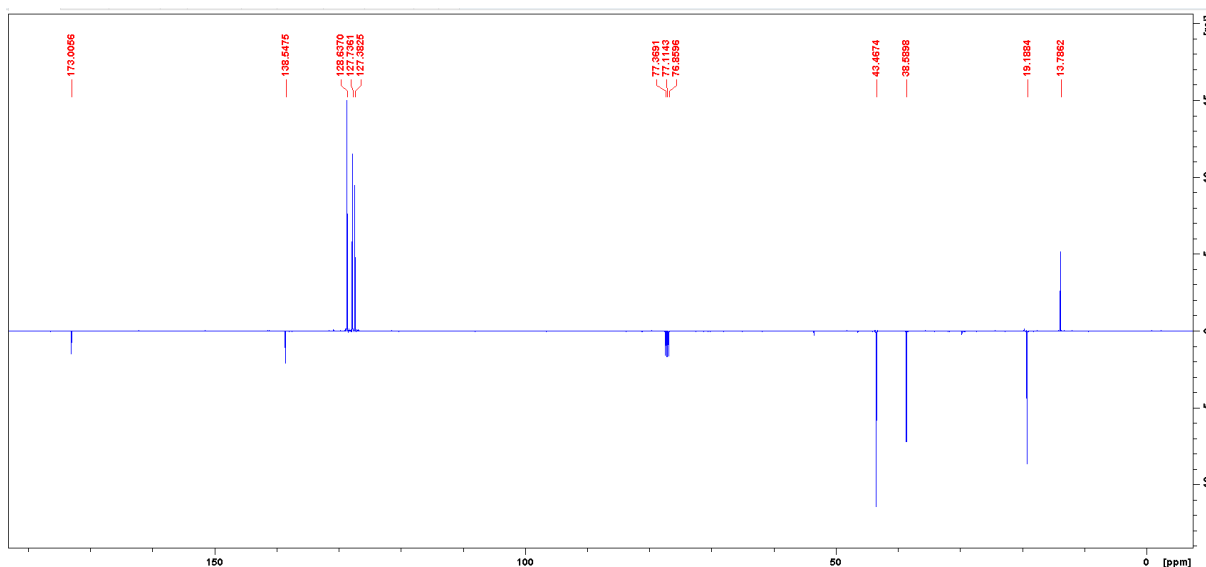

**Figure S6.** APT NMR spectrum of *N*-benzylbutyramide (**14**) measured Chloroform- $d$ , 99.8 atom % D at 296 K.

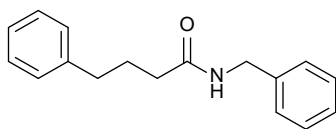

*N*-benzyl-4-phenylbutanamide (**15**)

The compound is obtained as a yellowish solid in 94% yield, mp= 79.2–80.2 °C (219.1 mg, 0.864 mmol).

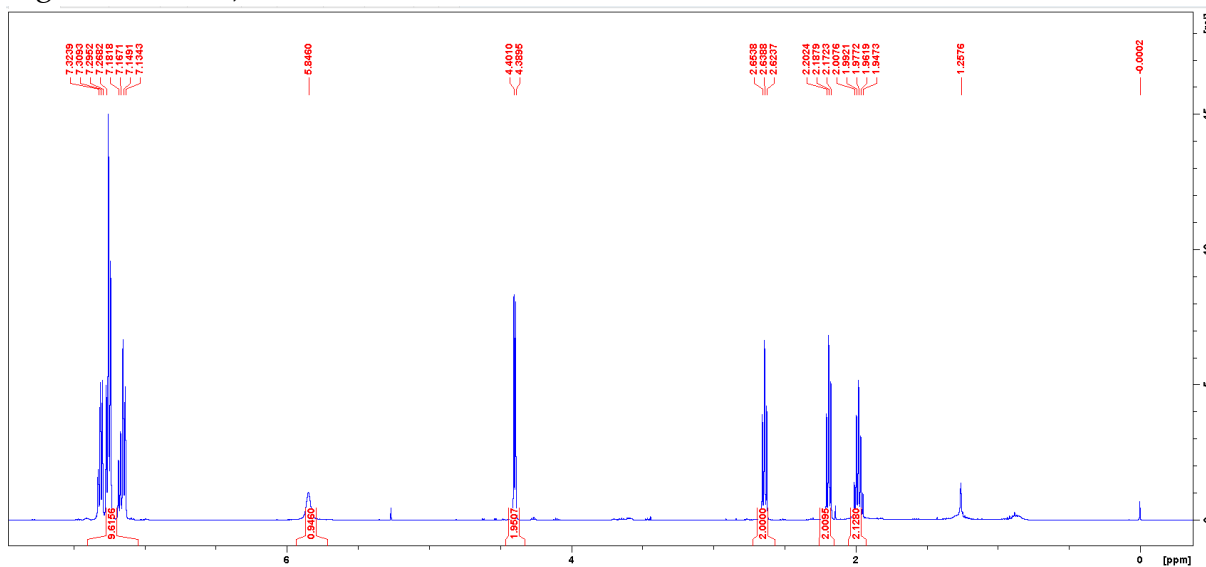

**Figure S7.**  $^1\text{H}$  NMR spectrum of *N*-benzyl-4-phenylbutanamide (**15**) measured in Chloroform- $d$ , 99.8 atom % D at 296 K.

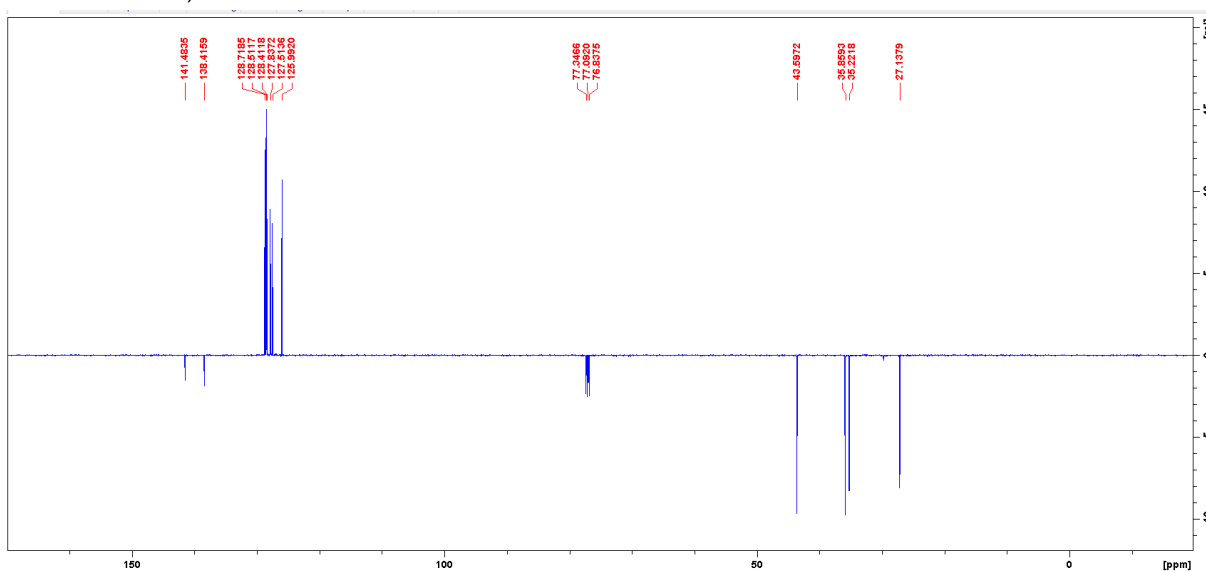

**Figure S8.** APT NMR spectrum of *N*-benzyl-4-phenylbutanamide (**15**) measured in Chloroform- $d$ , 99.8 atom % D at 296 K.

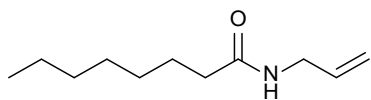

### N-allyloctanamide (**16**)

The compound is obtained as a yellow solid in 95% yield, mp= 27.6–28.3 °C (160.1 mg, 0.874 mmol).

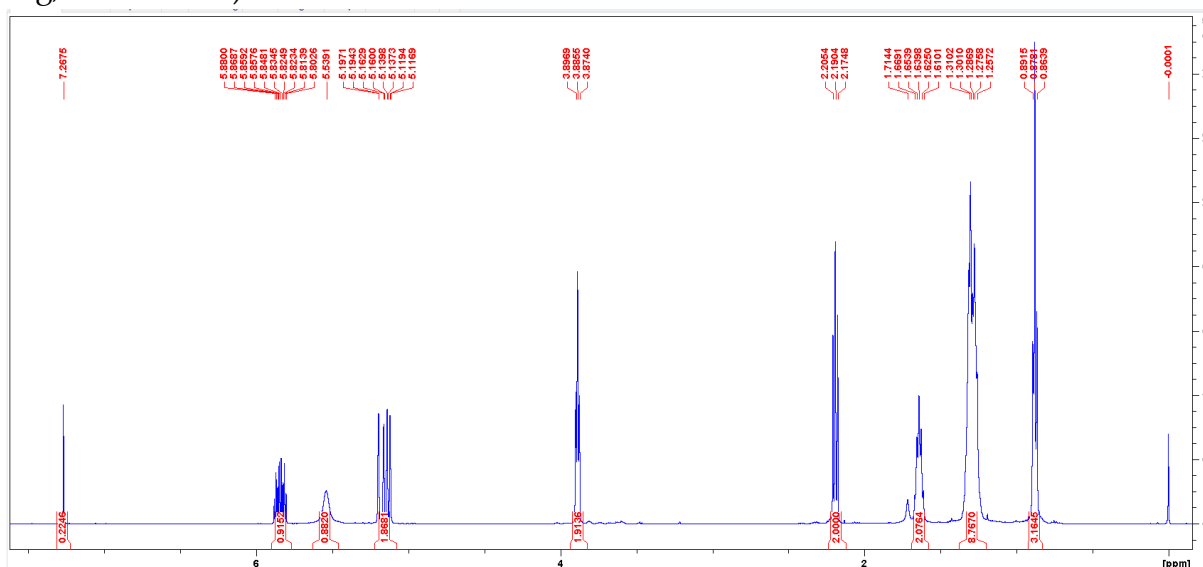

**Figure S9.**  $^1\text{H}$  NMR spectrum of *N*-allyloctanamide (**16**) measured in Chloroform- $d$ , 99.8 atom % D at 296 K.

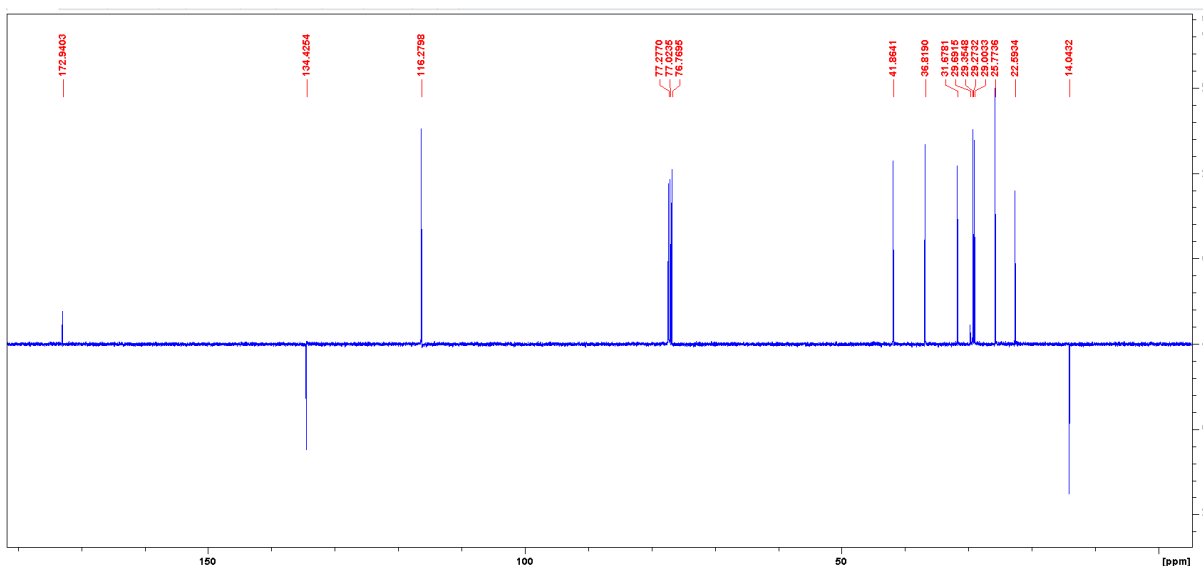

**Figure S10.** APT NMR spectrum of *N*-allyloctanamide (**16**) measured Chloroform- $d$ , 99.8 atom % D at 296 K.

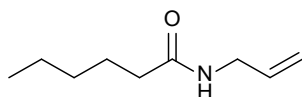

*N*-allylhexanamide (**17**)

The compound is obtained as a yellowish oil in 96% yield (161.8 mg, 0.883 mmol).

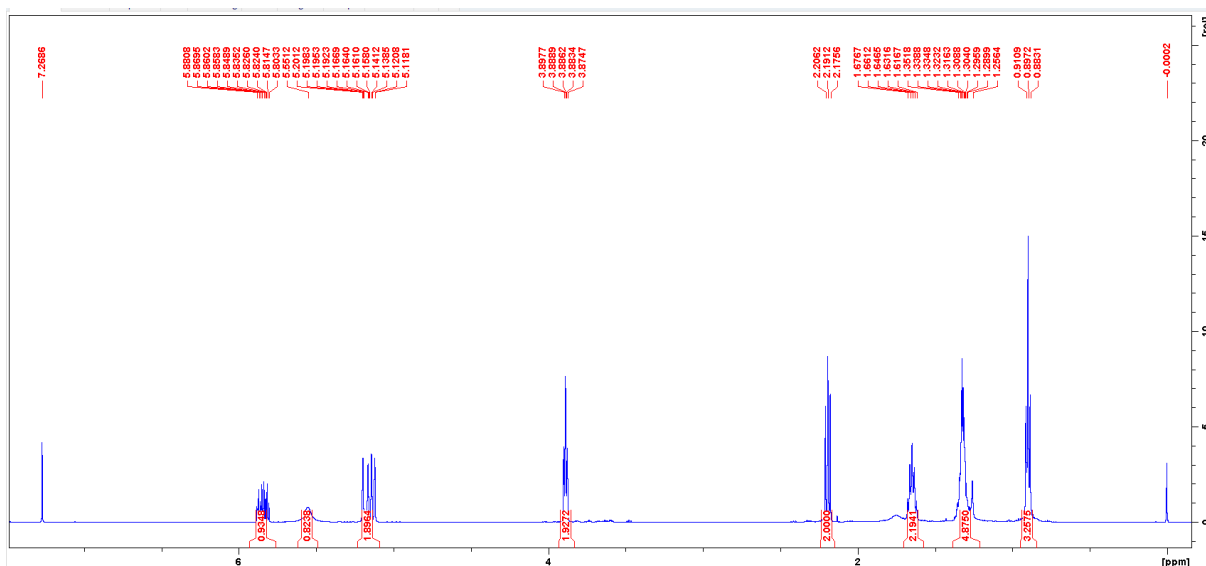

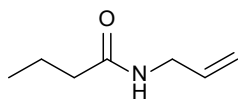

*N*-allylbutyramide (**18**)

The compound is obtained as a yellowish oil in 92% yield (107.5 mg, 0.846 mmol).

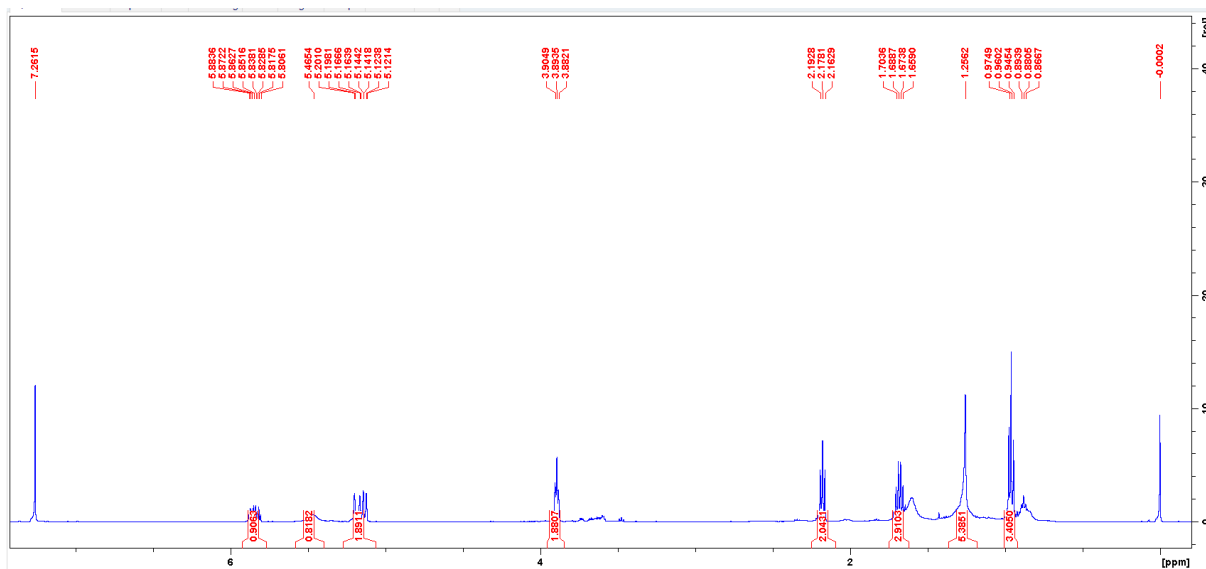

**Figure S13.** <sup>1</sup>H NMR spectrum of *N*-allylbutyramide (**18**) measured in Chloroform-d, 99.8 atom % D at 296 K.

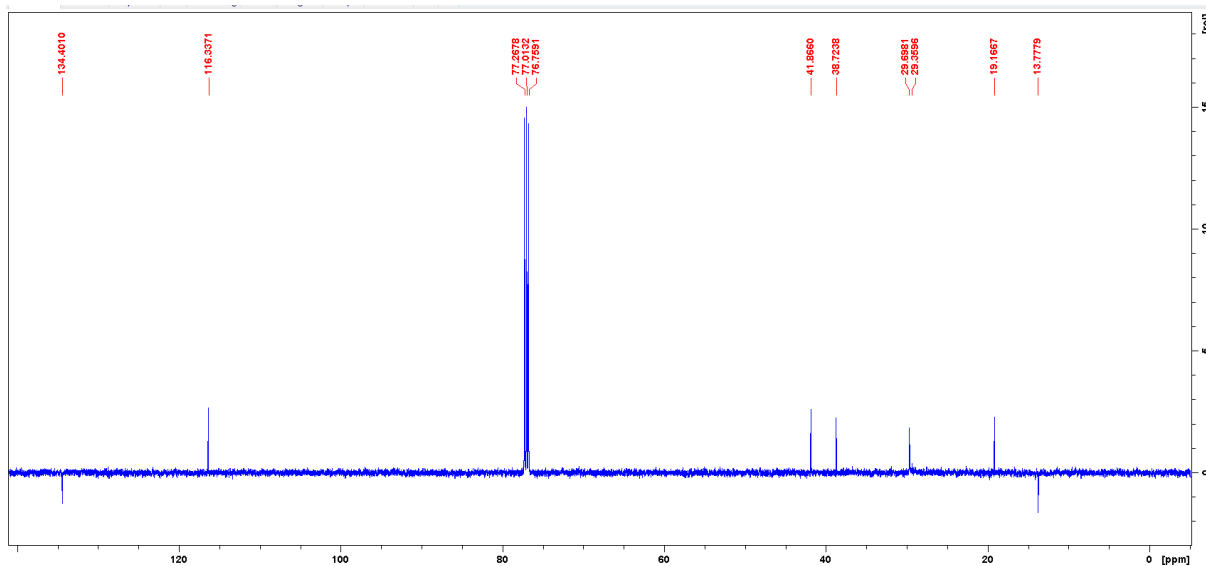

**Figure S14.** APT NMR spectrum of *N*-allylbutyramide (**18**) measured Chloroform-d, 99.8 atom % D at 296 K.



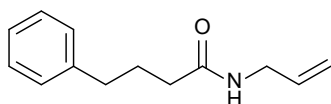

### *N*-allyl-4-phenylbutanamide (**19**)

The compound is obtained as a yellow oil in 96% yield (179.5 mg, 0.883 mmol).

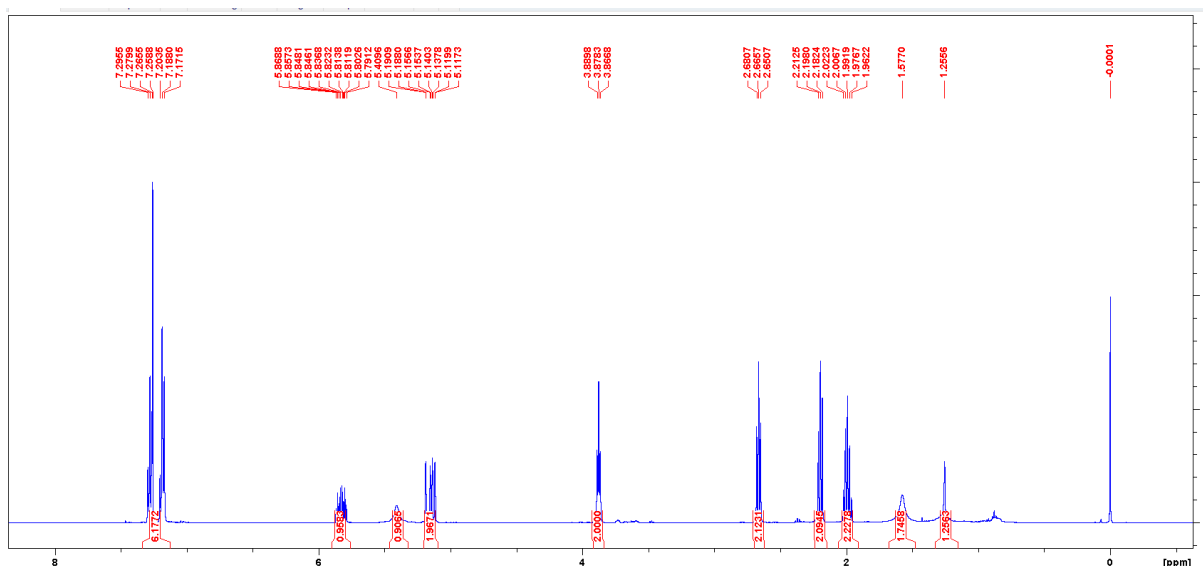

**Figure S15.**  $^1\text{H}$  NMR spectrum of *N*-allyl-4-phenylbutanamide (**19**) measured in Chloroform- $d$ , 99.8 atom % D at 296 K.

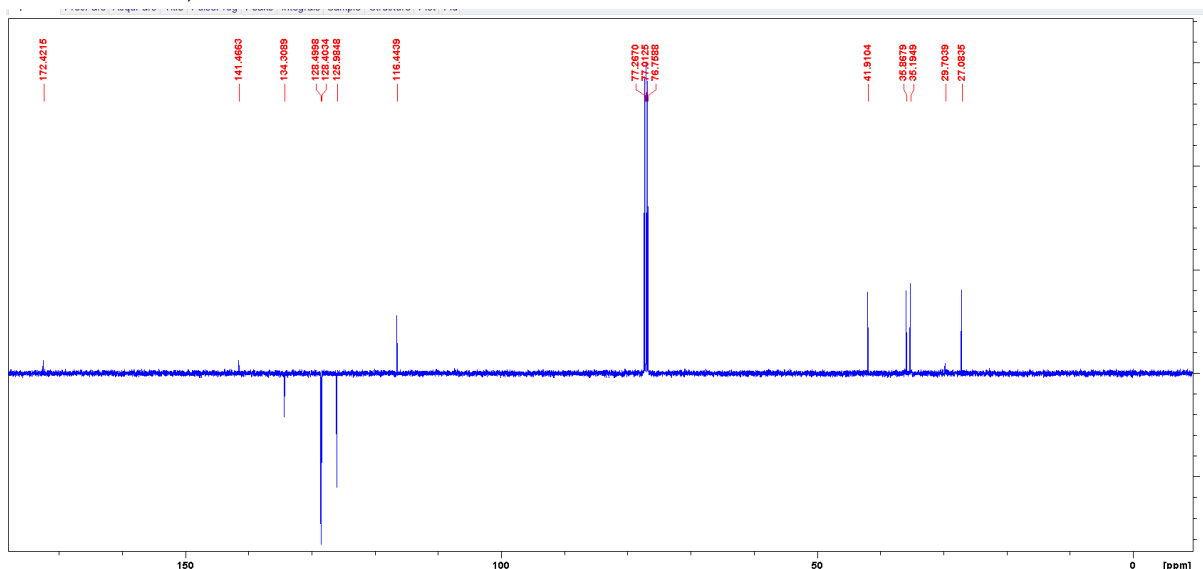

**Figure S16.** APT NMR spectrum of *N*-allyl-4-phenylbutanamide (**19**) measured in Chloroform- $d$ , 99.8 atom % D at 296 K.

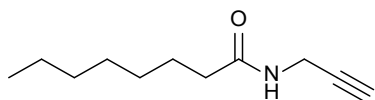

*N*-(prop-2-yn-1-yl)octanamide (**20**)

The compound is obtained as a white solid in 94% yield, mp= 72.4–73.4 °C (156.7 mg, 0.864 mmol).

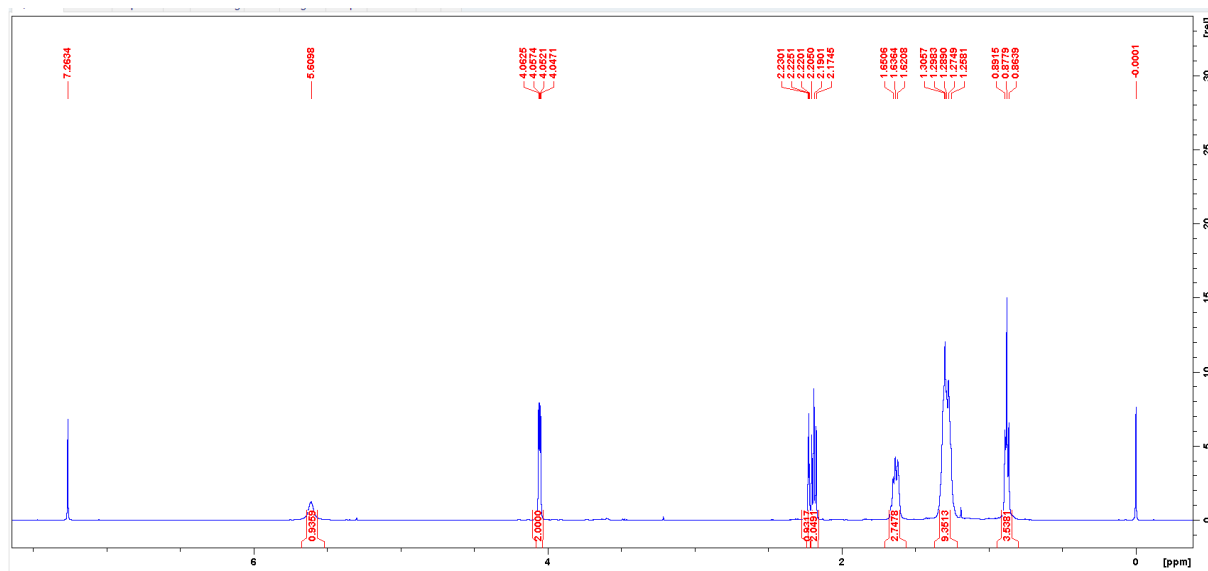

**Figure S17.**  $^1\text{H}$  NMR spectrum of *N*-(prop-2-yn-1-yl)octanamide (**20**) measured in Chloroform- $d$ , 99.8 atom % D at 296 K.

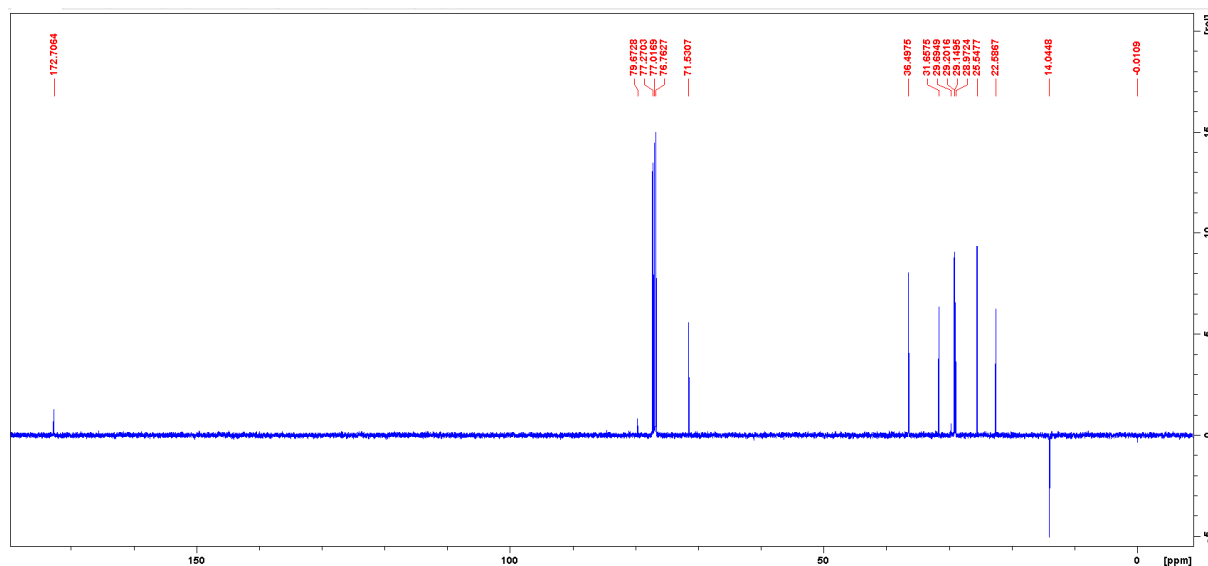

**Figure S18.** APT NMR spectrum of *N*-(prop-2-yn-1-yl)octanamide (**20**) measured in Chloroform- $d$ , 99.8 atom % D at 296 K.

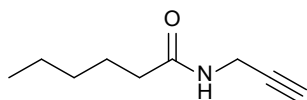

*N*-(prop-2-yn-1-yl)hexanamide (**21**)

The compound is obtained as a white solid in 95% yield, mp= 47.3–48.0 °C (156.7 mg, 0.864 mmol).

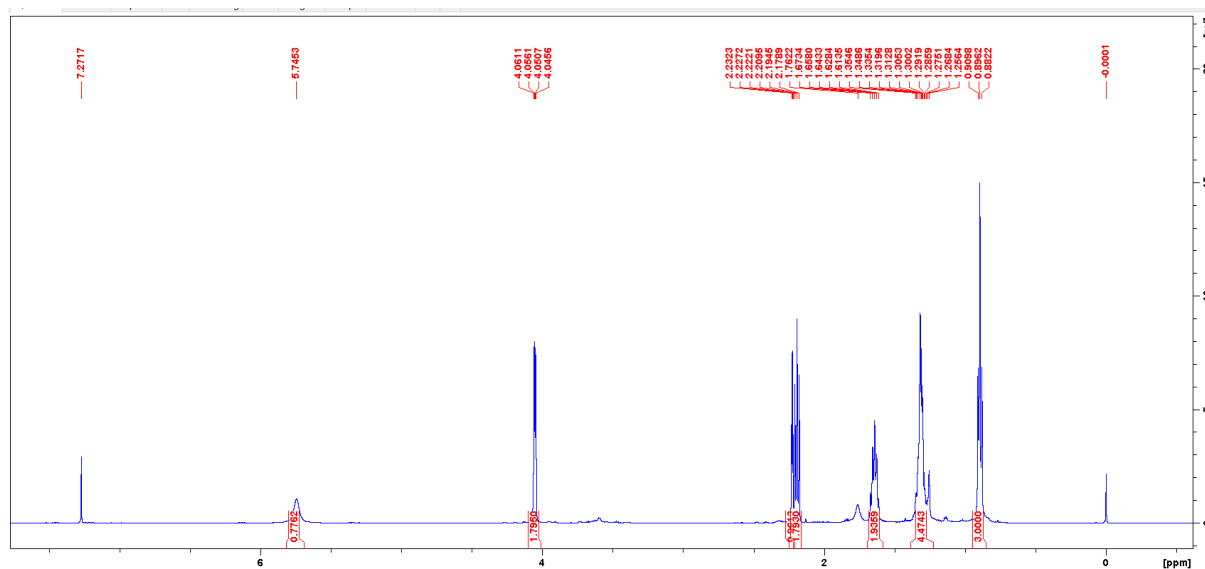

**Figure S19.**  $^1\text{H}$  NMR spectrum of *N*-(prop-2-yn-1-yl)hexanamide (**21**) measured in Chloroform- $d$ , 99.8 atom % D at 296 K.

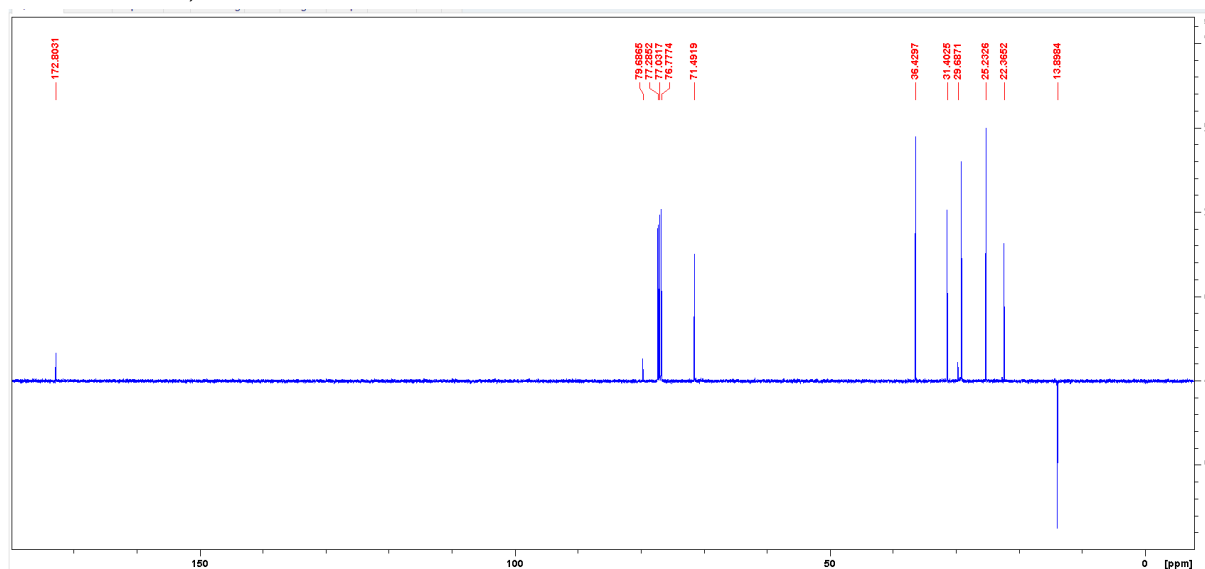

**Figure S20.** APT NMR spectrum of *N*-(prop-2-yn-1-yl)hexanamide (**21**) measured in Chloroform- $d$ , 99.8 atom % D at 296 K.

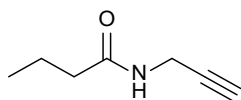

*N*-(prop-2-yn-1-yl)butyramide (**22**)

The compound is obtained as a yellowish solid in 90% yield, mp= 26.1–26.6 °C (103.5 mg, 0.828 mmol).

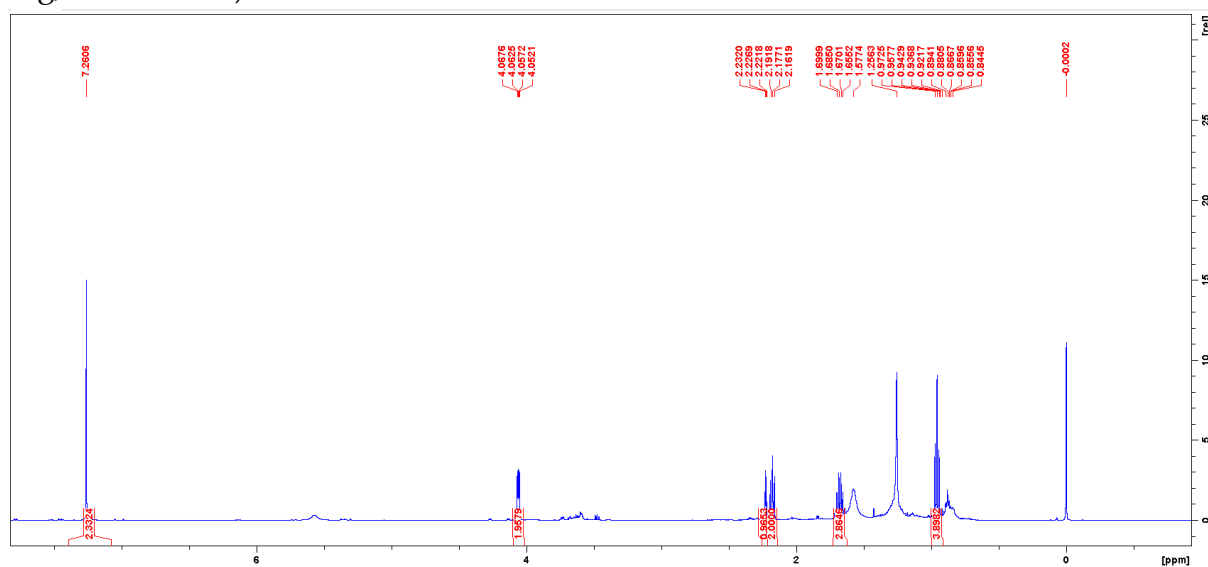

**Figure S21.**  $^1\text{H}$  NMR spectrum of *N*-(prop-2-yn-1-yl)butyramide (**22**) measured in Chloroform- $d$ , 99.8 atom % D at 296 K.

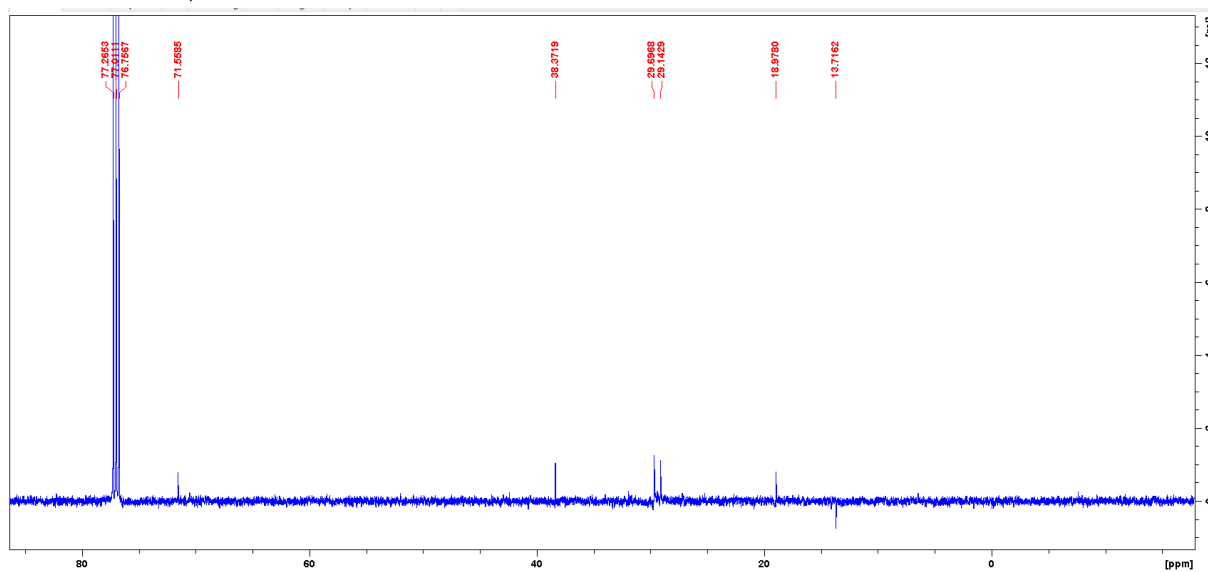

**Figure S22.** APT NMR spectrum of *N*-(prop-2-yn-1-yl)butyramide (**22**) measured in Chloroform- $d$ , 99.8 atom % D at 296 K.

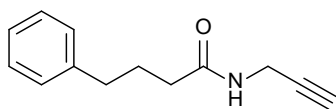

4-phenyl-*N*-(prop-2-yn-1-yl)butanamide (**23**)

The compound is obtained as a colorless oil in 93% yield (172.1 mg, 0.855 mmol).

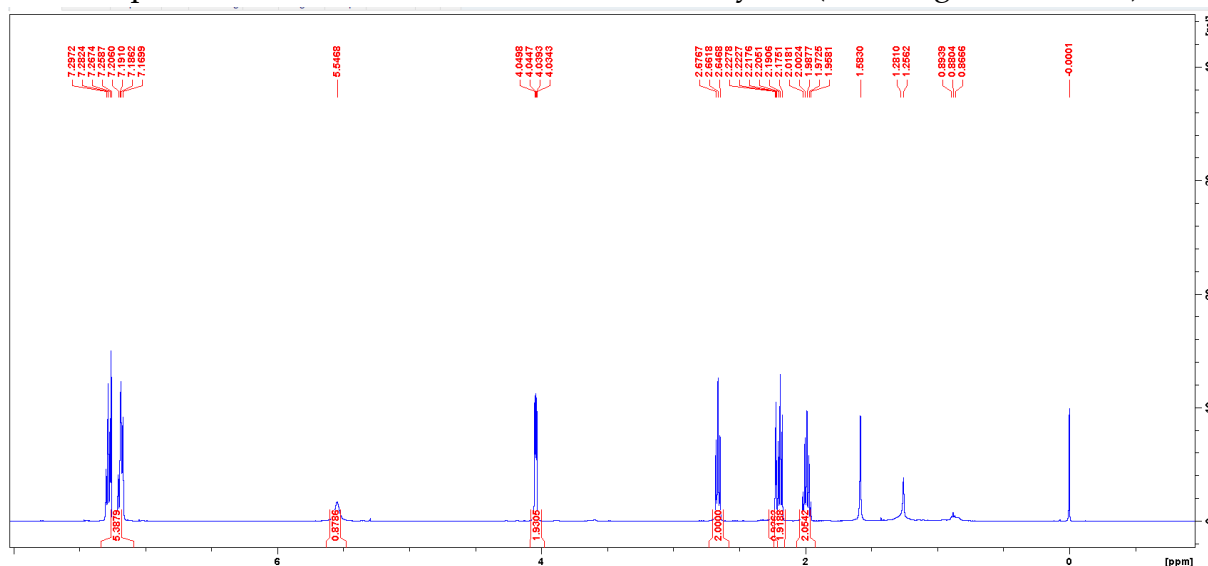

**Figure S23.**  $^1\text{H}$  NMR spectrum of 4-phenyl-*N*-(prop-2-yn-1-yl)butanamide (**23**) measured in Chloroform- $d$ , 99.8 atom % D at 296 K.

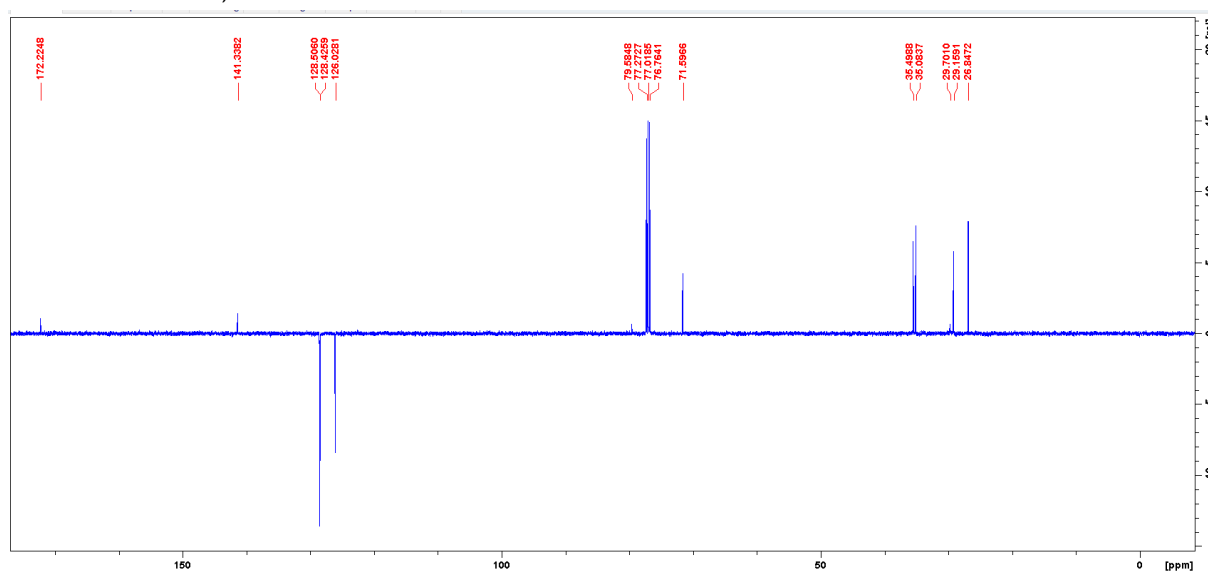

**Figure S24.** APT NMR spectrum of 4-phenyl-*N*-(prop-2-yn-1-yl)butanamide (**23**) measured Chloroform- $d$ , 99.8 atom % D at 296 K.

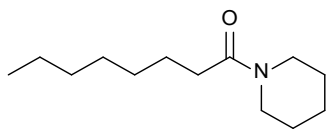

1-(piperidin-1-yl)octan-1-one (**24**)

The compound is obtained as a colorless oil in 96% yield (186.5 mg, 0.883 mmol).

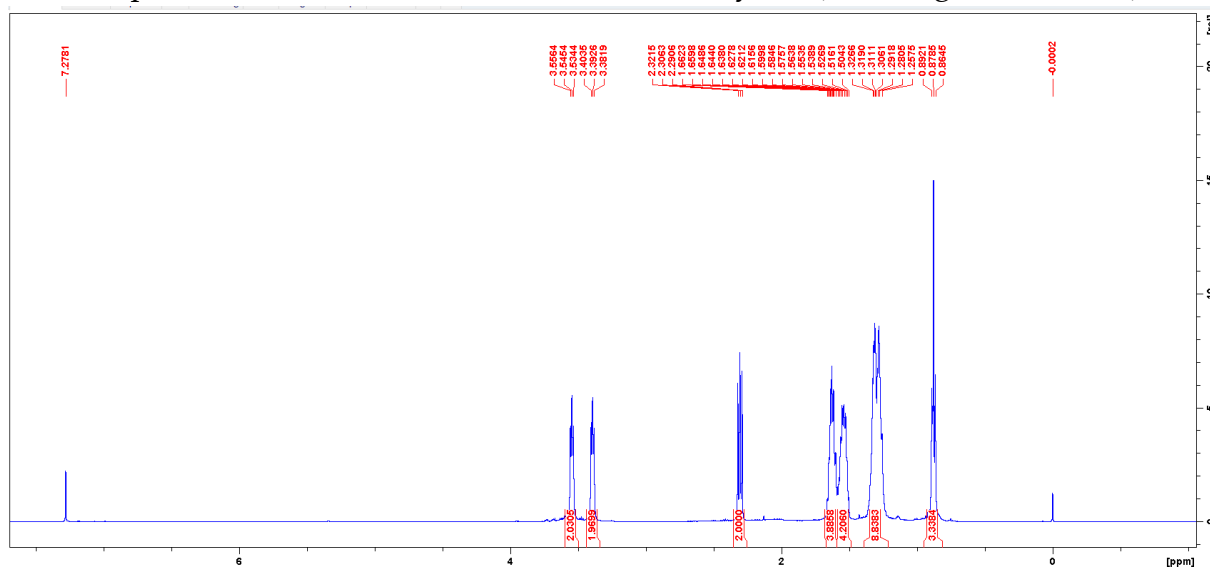

**Figure S25.**  $^1\text{H}$  NMR spectrum of 1-(piperidin-1-yl)octan-1-one (**24**) measured in Chloroform- $d$ , 99.8 atom % D at 296 K.

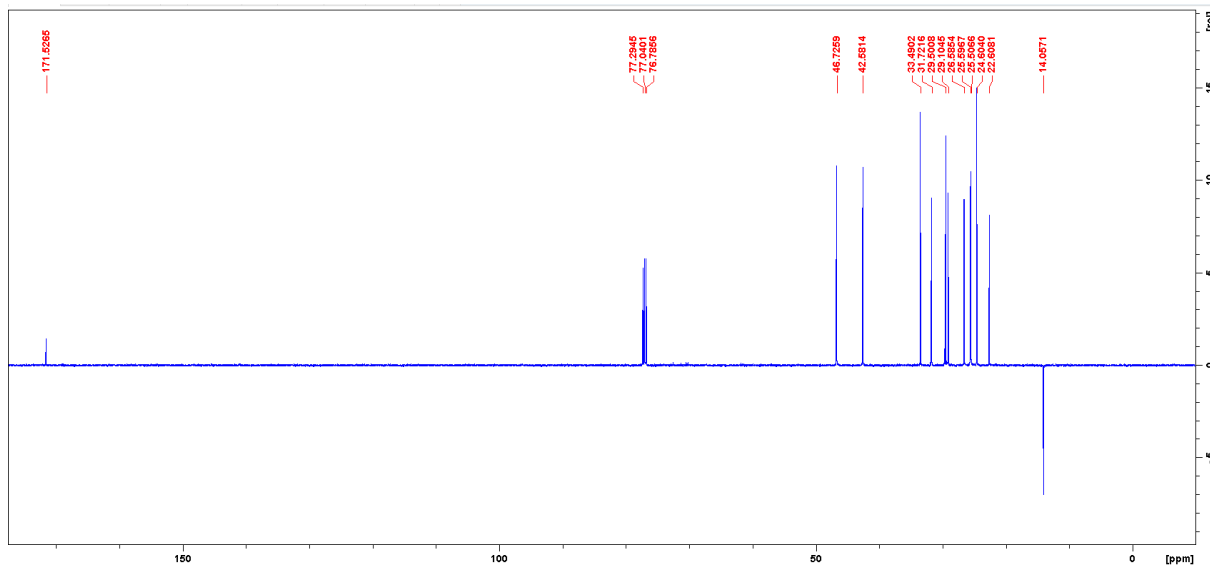

**Figure S26.** APT NMR spectrum of 1-(piperidin-1-yl)octan-1-one (**24**) measured Chloroform- $d$ , 99.8 atom % D at 296 K.

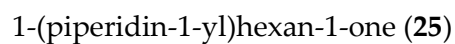

The compound is obtained as a yellowish oil in 90% yield (151.7 mg, 0.828 mmol).

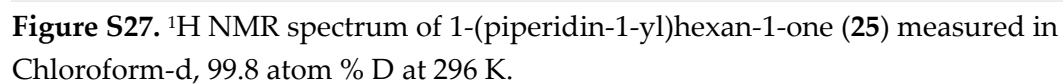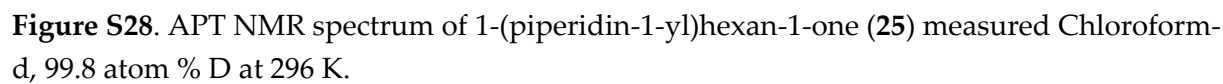

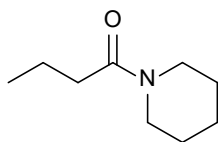

1-(piperidin-1-yl)butan-1-one (**26**)

The compound is obtained as a yellow oil in 90% yield (128.4 mg, 0.828 mmol).

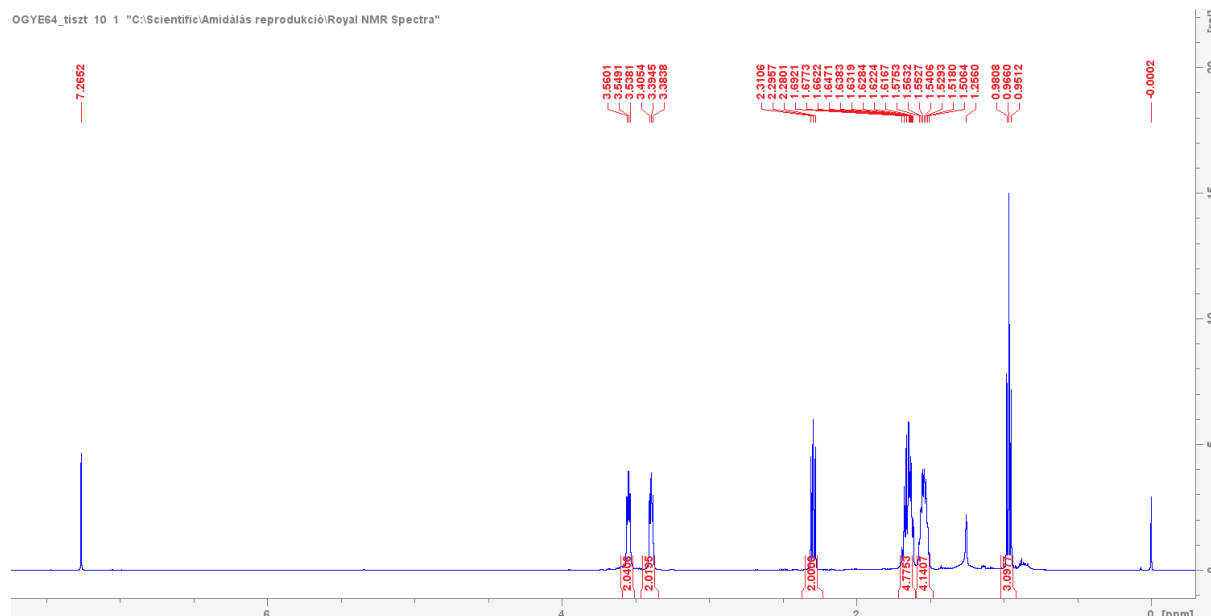

**Figure S29.**  $^1\text{H}$  NMR spectrum of 1-(piperidin-1-yl)butan-1-one (**26**) measured in Chloroform- $d$ , 99.8 atom % D at 296 K.

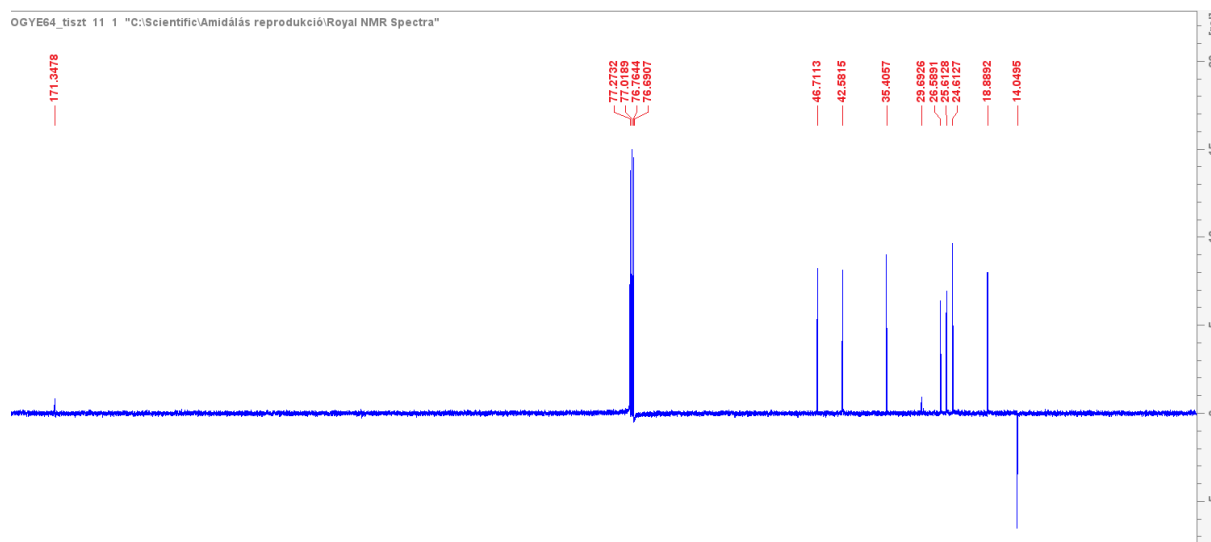

**Figure S30.** APT NMR spectrum of 1-(piperidin-1-yl)butan-1-one (**26**) measured in Chloroform- $d$ , 99.8 atom % D at 296 K.



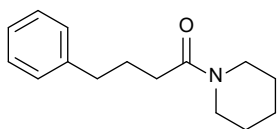

4-phenyl-1-(piperidin-1-yl)butan-1-one (**27**)

The compound is obtained as a white solid in 95% yield, mp= 153.9–154.4 °C (202.1 mg, 0.874 mmol).

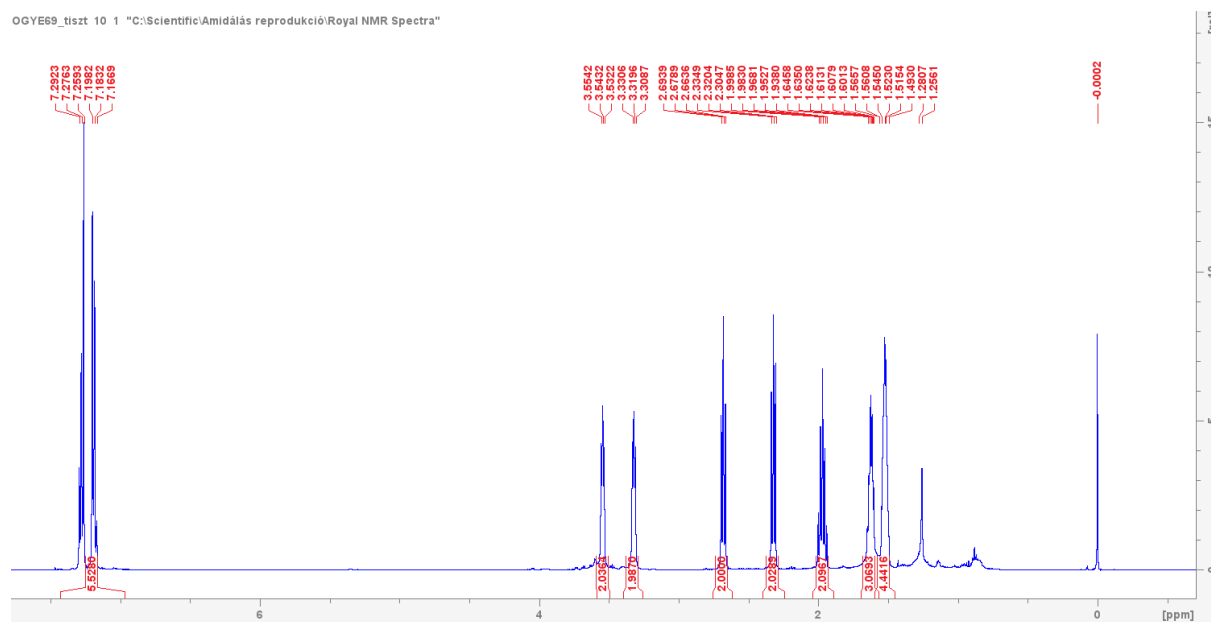

**Figure S31.**  $^1\text{H}$  NMR spectrum of 4-phenyl-1-(piperidin-1-yl)butan-1-one (**27**) measured in Chloroform-d, 99.8 atom % D at 296 K.

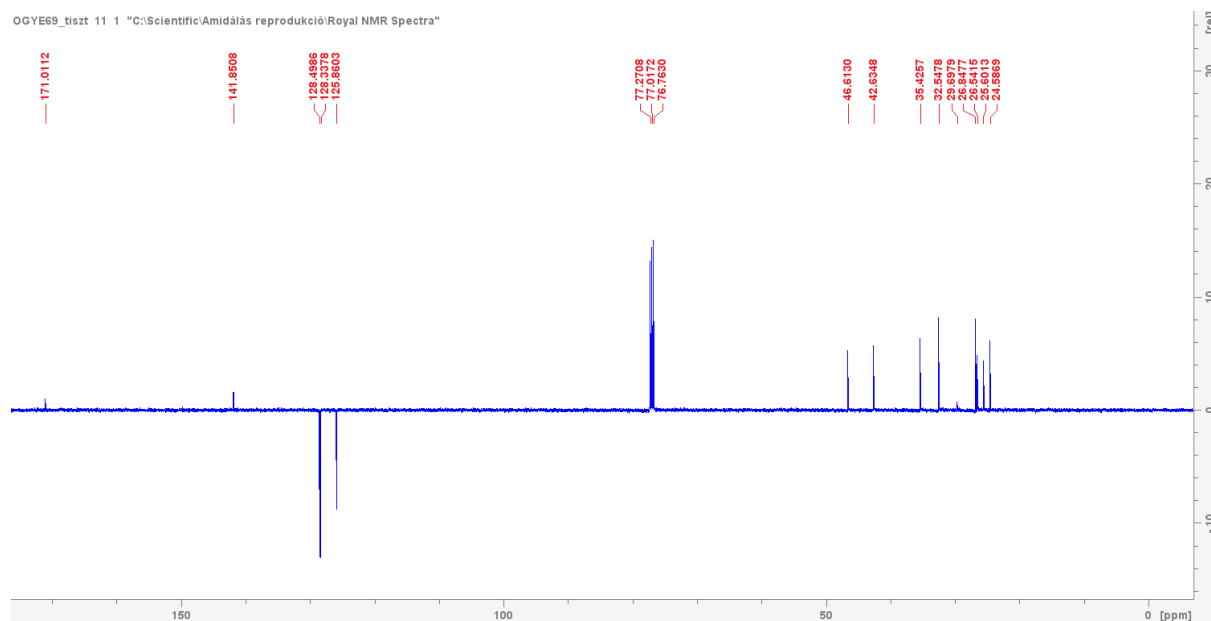

**Figure S32.** APT NMR spectrum of 4-phenyl-1-(piperidin-1-yl)butan-1-one (**27**) measured in Chloroform-d, 99.8 atom % D at 296 K.

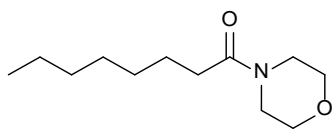

1-morpholinooctan-1-one (**28**)

The compound is obtained as a colorless oil in 96% yield (188.4 mg, 0.883 mmol).

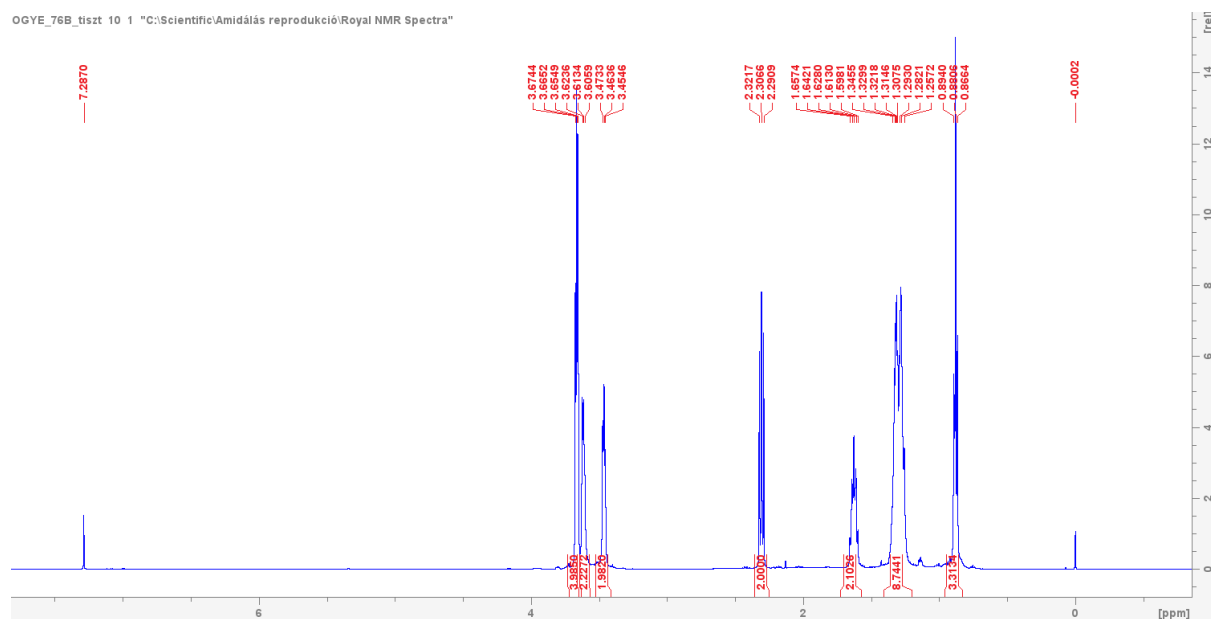

**Figure S33.**  $^1\text{H}$  NMR spectrum of 1-morpholinooctan-1-one (**28**) measured in Chloroform-d, 99.8 atom % D at 296 K.

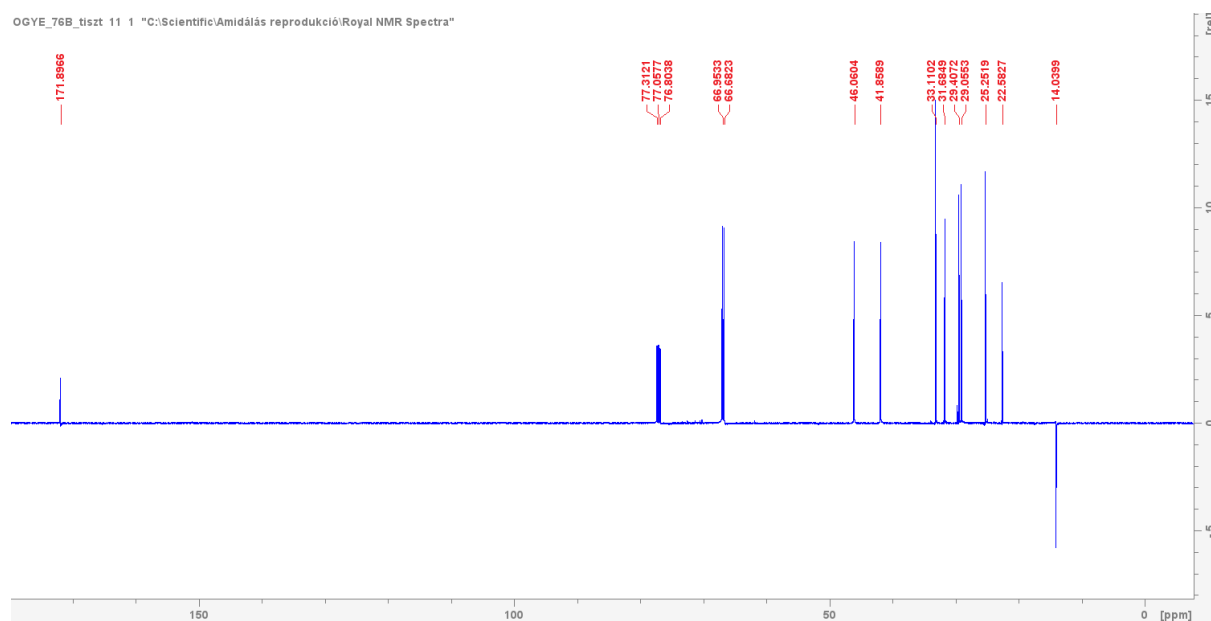

**Figure S34.** APT NMR spectrum of 1-morpholinooctan-1-one (**28**) measured in Chloroform-d, 99.8 atom % D at 296 K.

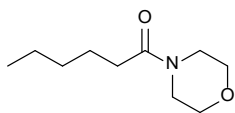

### 1-morpholinohexan-1-one (29)

The compound is obtained as a yellowish oil in 94% yield (160.2 mg, 0.864 mmol).

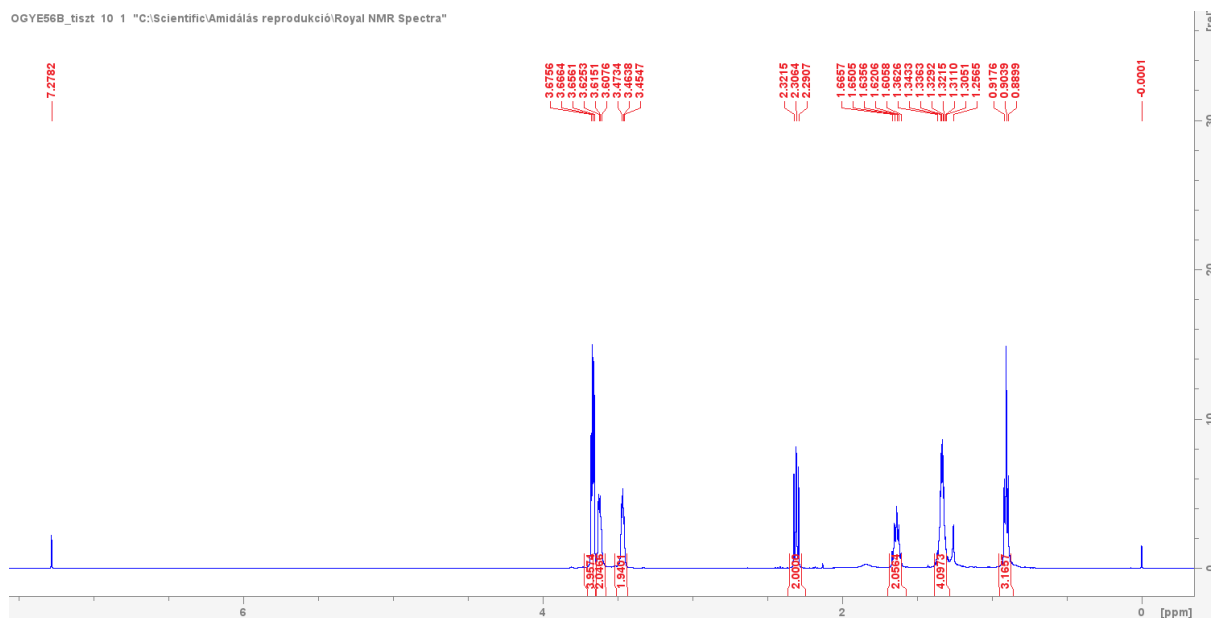

**Figure S35.**  $^1\text{H}$  NMR spectrum of 1-morpholinohexan-1-one (29) measured in Chloroform-d, 99.8 atom % D at 296 K.

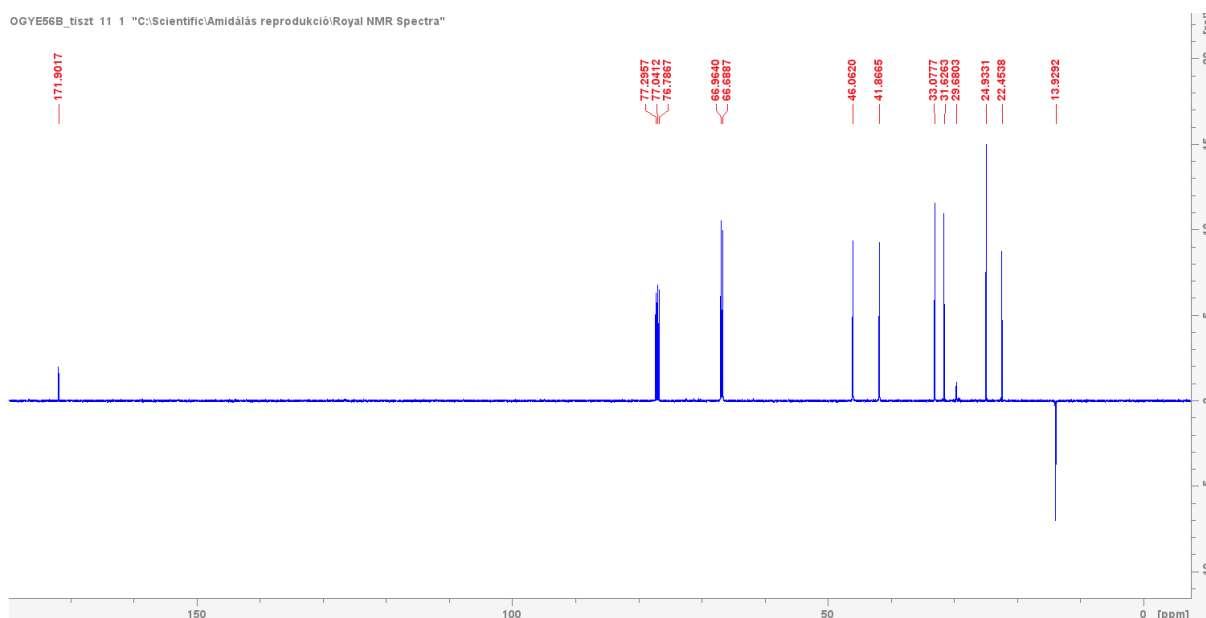

**Figure S36.** APT NMR spectrum of 1-morpholinohexan-1-one (29) measured in Chloroform-d, 99.8 atom % D at 296 K.

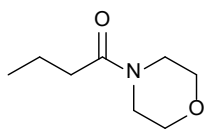

### 1-morpholinobutan-1-one (30)

The compound is obtained as a colorless oil in 91% yield (188.4 mg, 0.837 mmol).

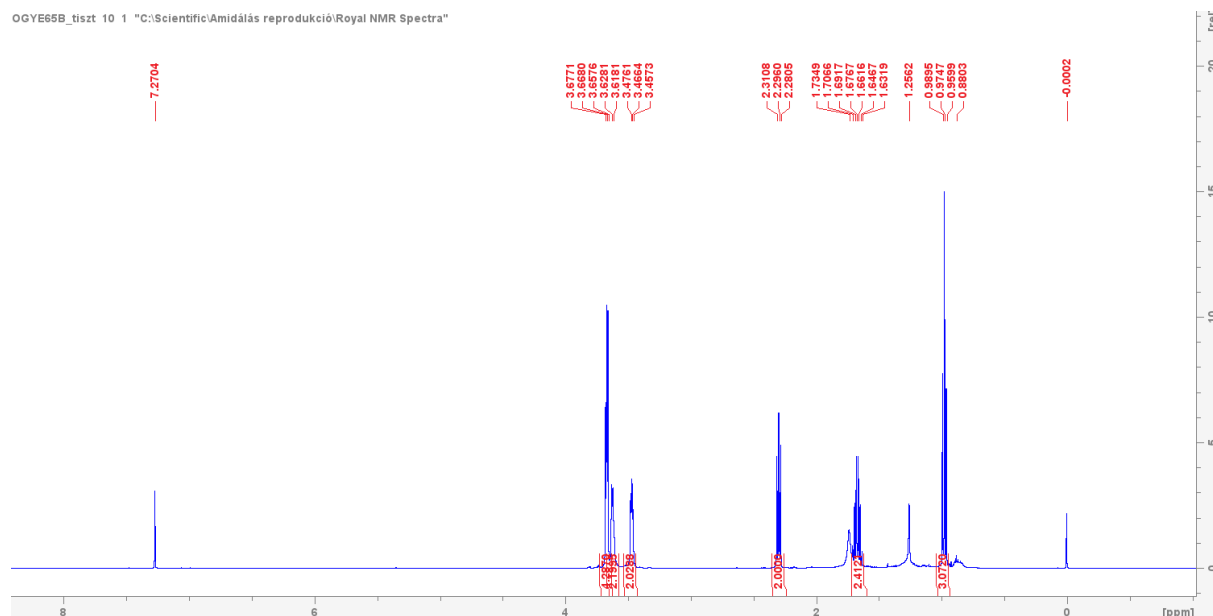

**Figure S37.**  $^1\text{H}$  NMR spectrum of 1-morpholinobutan-1-one (30) measured in Chloroform-d, 99.8 atom % D at 296 K.

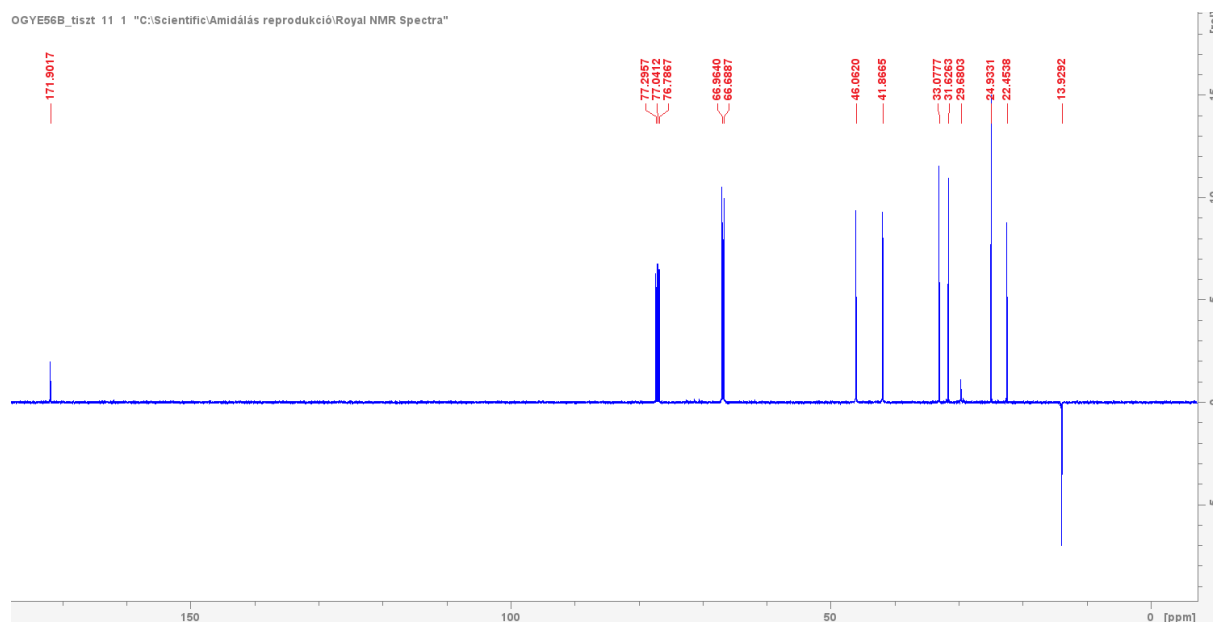

**Figure S38.** APT NMR spectrum of 1-morpholinobutan-1-one (30) measured in Chloroform-d, 99.8 atom % D at 296 K.

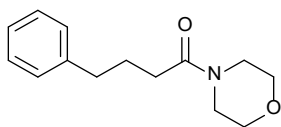

1-morpholino-4-phenylbutan-1-one (**31**)

The compound is obtained as a white solid in 92% yield, mp= 40.7–42.5 °C (197.4 mg, 0.846 mmol).

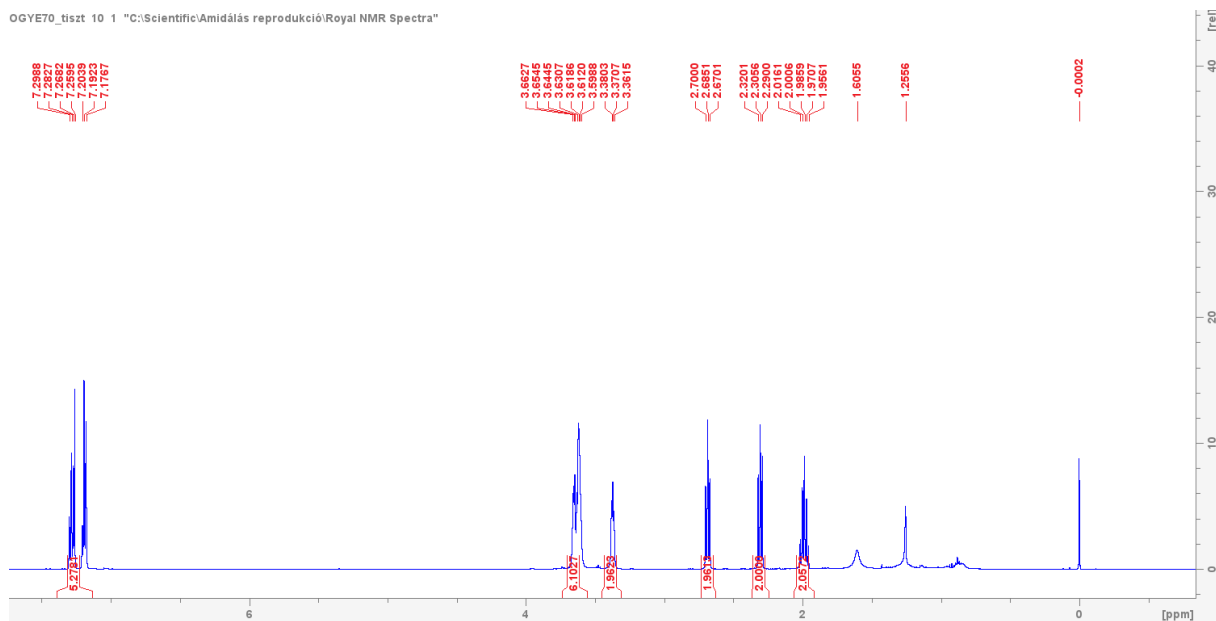

**Figure S39.**  $^1\text{H}$  NMR spectrum of 1-morpholino-4-phenylbutan-1-one (**31**) measured in Chloroform- $d$ , 99.8 atom % D at 296 K.

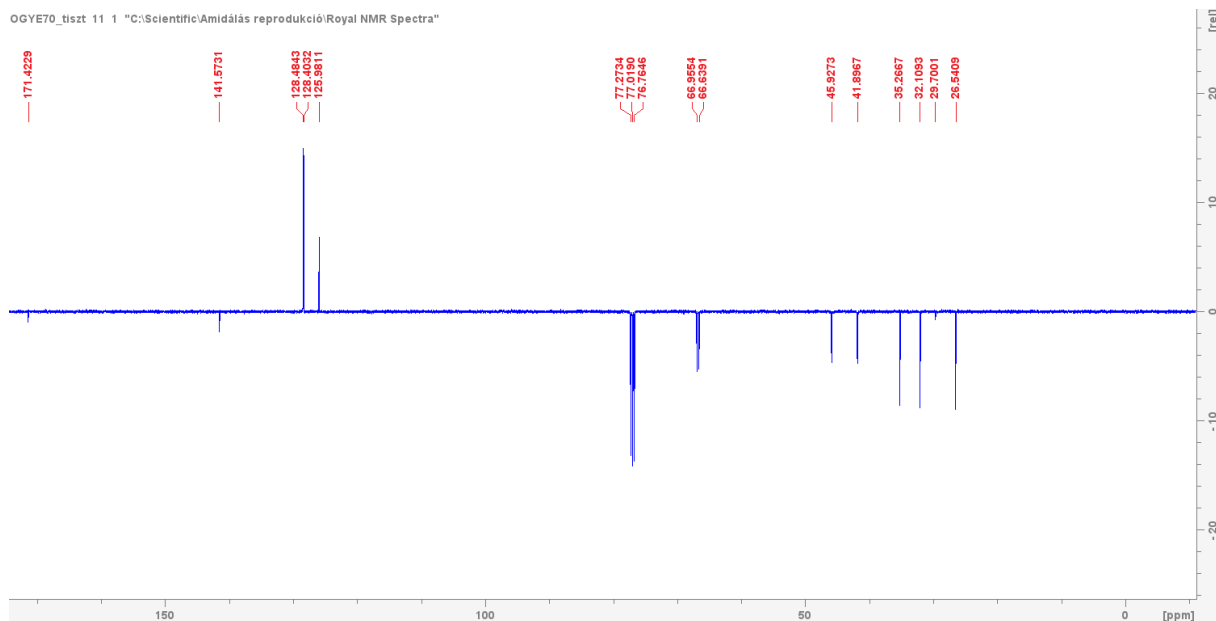

**Figure S40.** APT NMR spectrum of 1-morpholino-4-phenylbutan-1-one (**31**) measured in Chloroform- $d$ , 99.8 atom % D at 296 K.

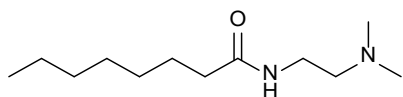

*N*-(2-(dimethylamino)ethyl)octanamide (**32**)

The compound is obtained as a colorless oil in 95% yield (187.3 mg, 0.874 mmol).

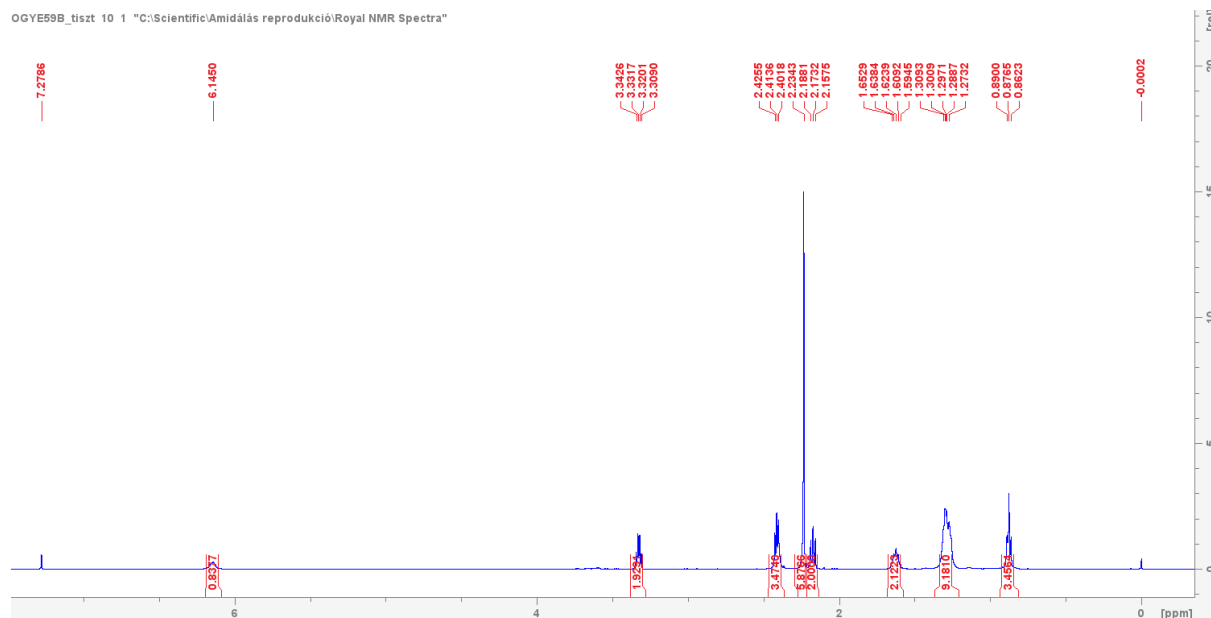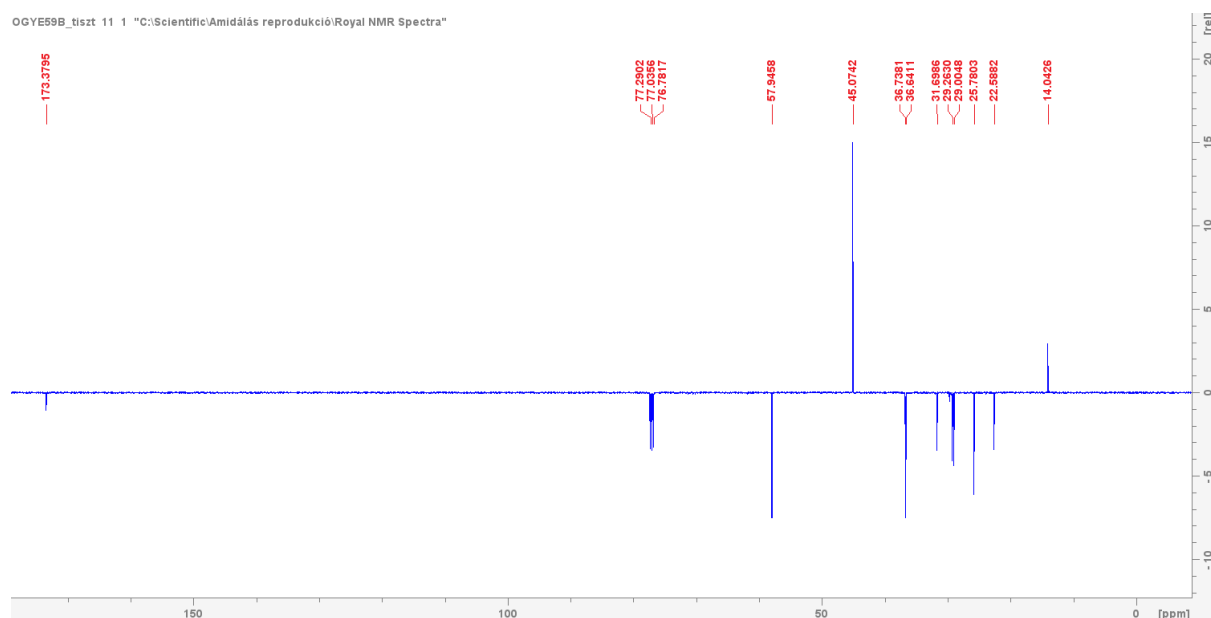

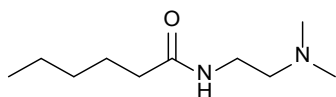

### *N*-(2-(dimethylamino)ethyl)hexanamide (**33**)

The compound is obtained as a colorless oil in 95% yield (162.8 mg, 0.873 mmol).

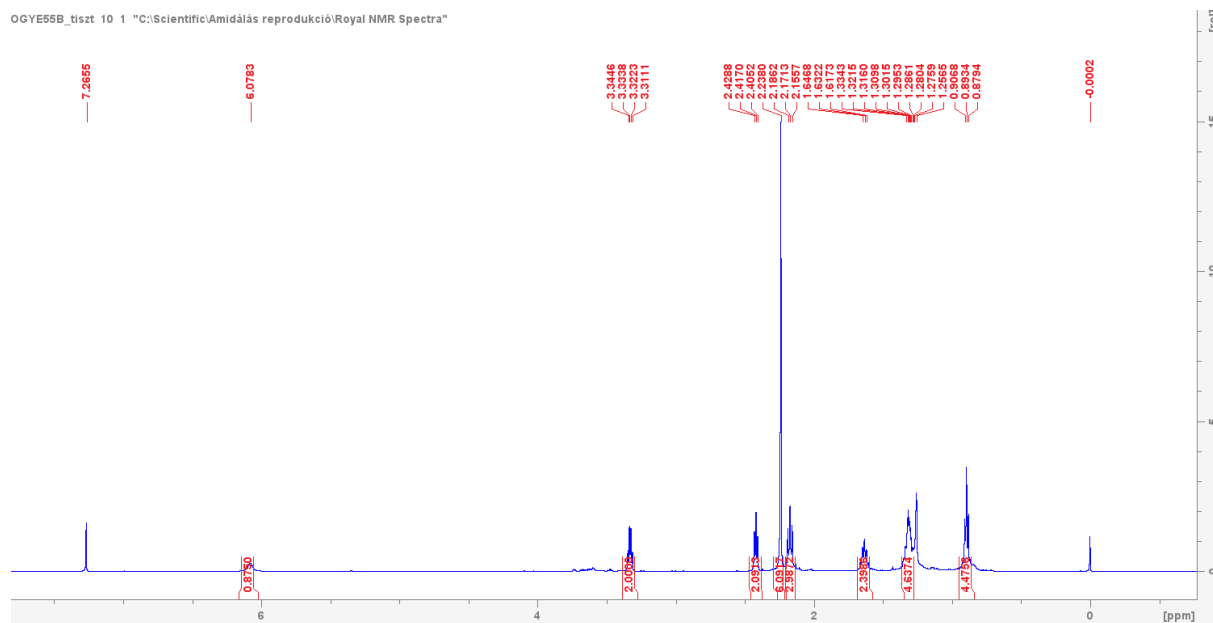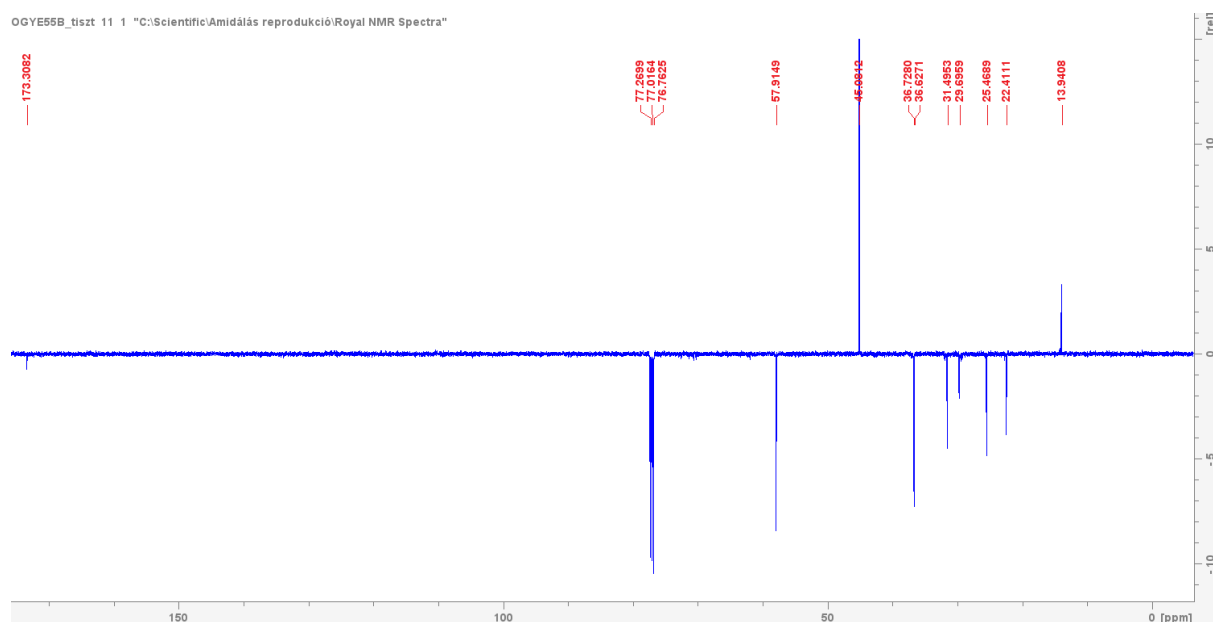

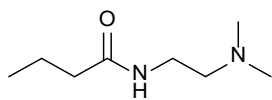

*N*-(2-(dimethylamino)ethyl)butyramide (**34**)

The compound is obtained as a yellowish oil in 91% yield (132.4 mg, 0.837 mmol).

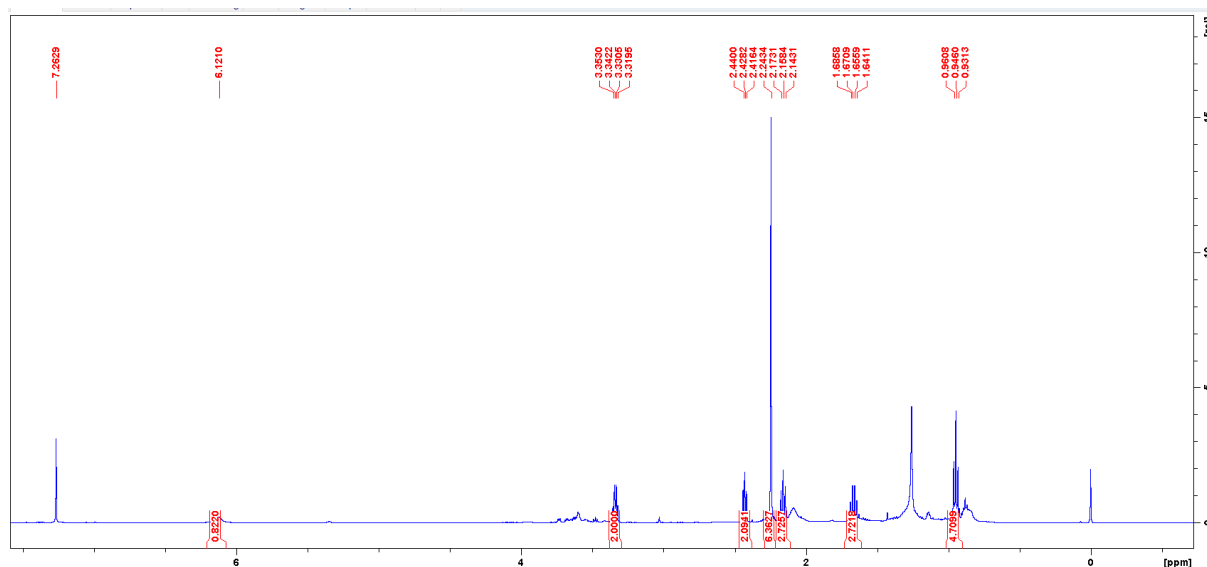

**Figure S45.** <sup>1</sup>H NMR spectrum of *N*-(2-(dimethylamino)ethyl)butyramide (**34**) measured in Chloroform-d, 99.8 atom % D at 296 K.

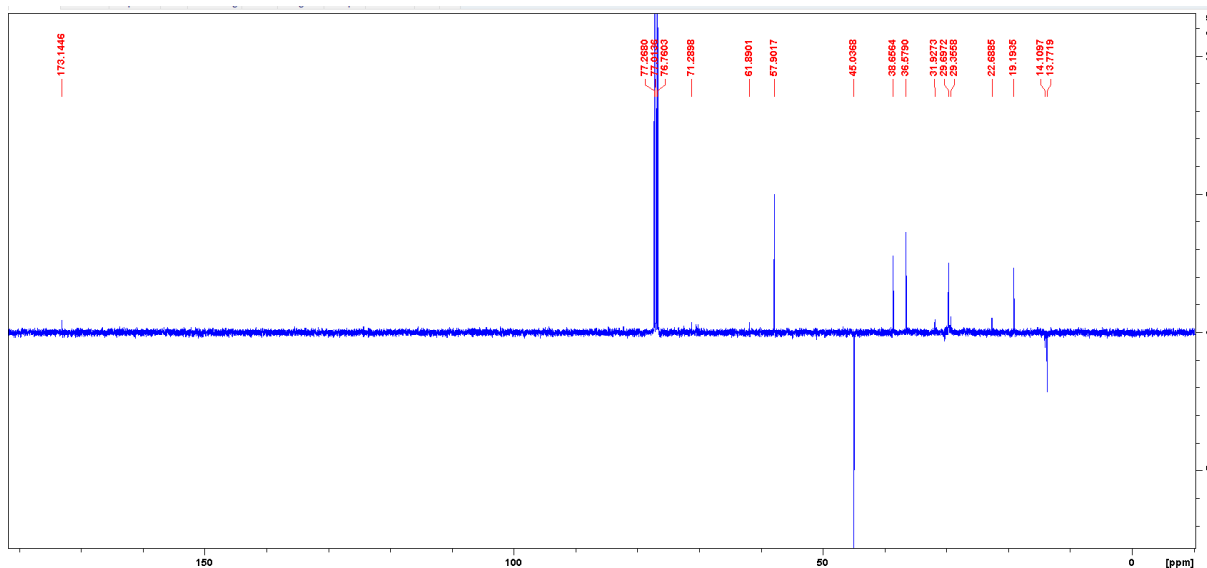

**Figure S46.** <sup>13</sup>C NMR spectrum of *N*-(2-(dimethylamino)ethyl)butyramide (**34**) measured in Chloroform-d, 99.8 atom % D at 296 K.



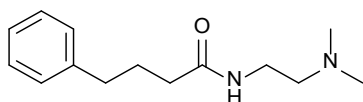

*N*-(2-(dimethylamino)ethyl)-4-phenylbutanamide (**35**)

The compound is obtained as a yellowish oil in 94% yield (202.6 mg, 0.864 mmol).

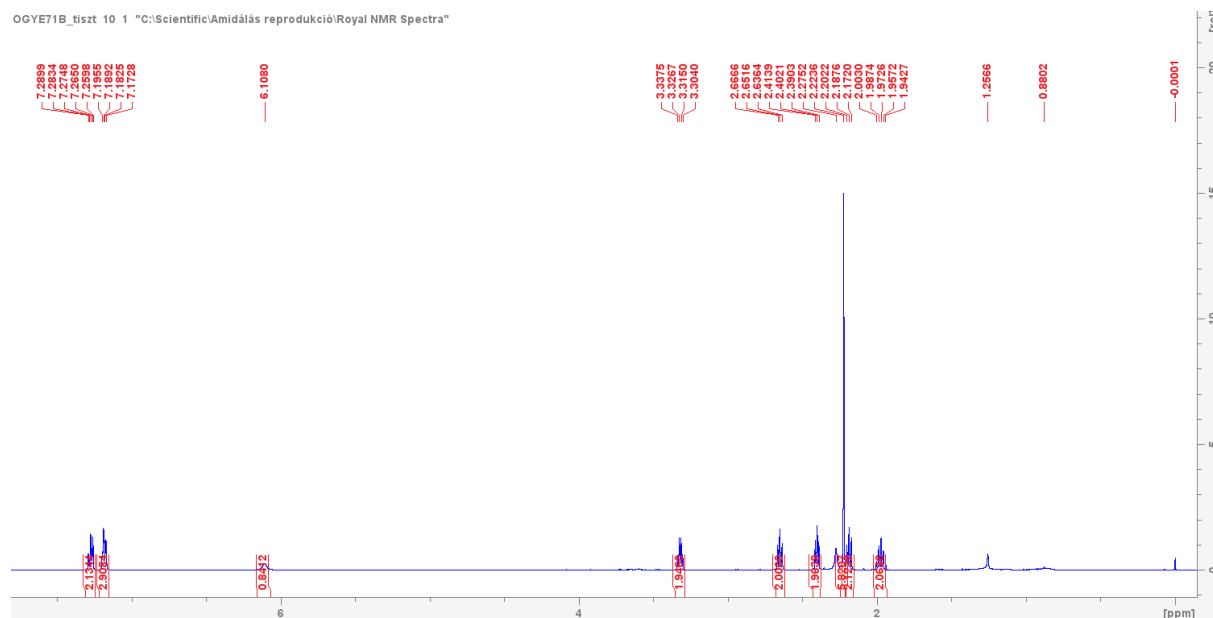

**Figure S47.**  $^1\text{H}$  NMR spectrum of *N*-(2-(dimethylamino)ethyl)-4-phenylbutanamide (**35**) measured in Chloroform- $d$ , 99.8 atom % D at 296 K.

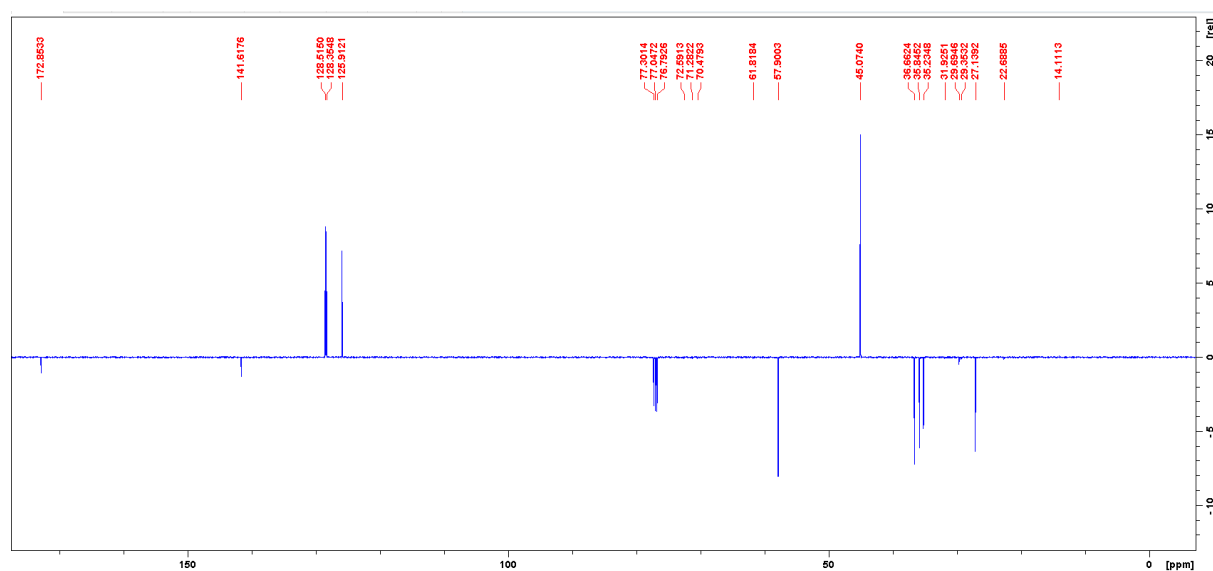

**Figure S48.** APT NMR spectrum of *N*-(2-(dimethylamino)ethyl)-4-phenylbutanamide (**35**) measured in Chloroform- $d$ , 99.8 atom % D at 296 K.

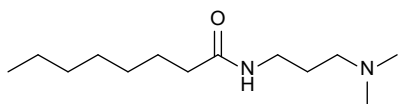

*N*-(3-(dimethylamino)propyl)octanamide (**36**)

The compound is obtained as a colorless oil in 94% yield (197.4 mg, 0.864 mmol).

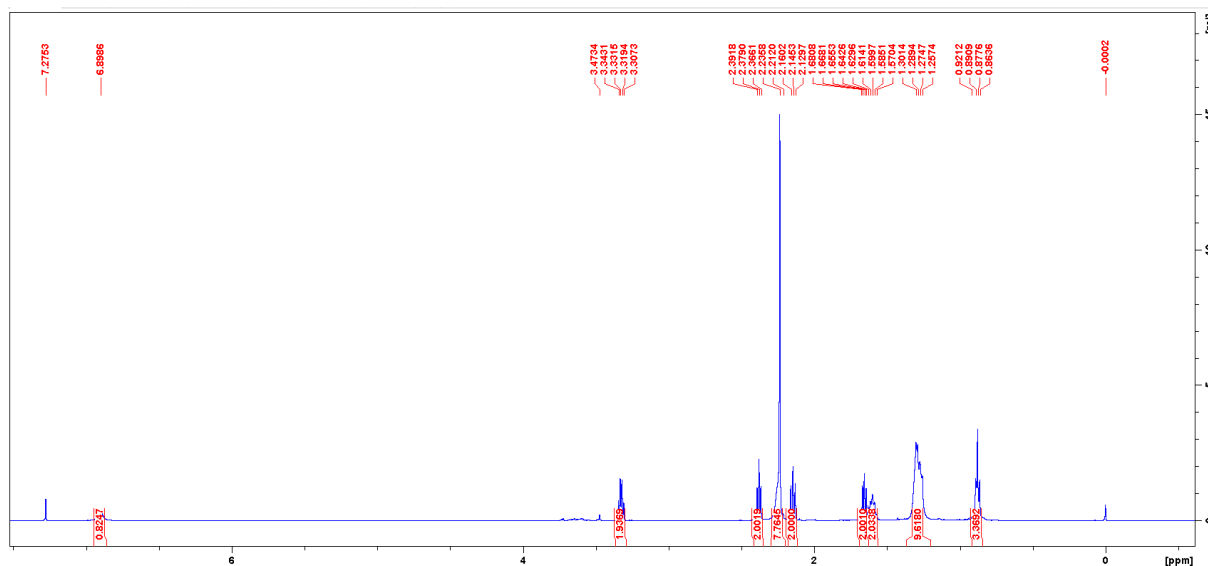

**Figure S49.** <sup>1</sup>H NMR spectrum of *N*-(3-(dimethylamino)propyl)octanamide (**36**) measured in Chloroform-d, 99.8 atom % D at 296 K.

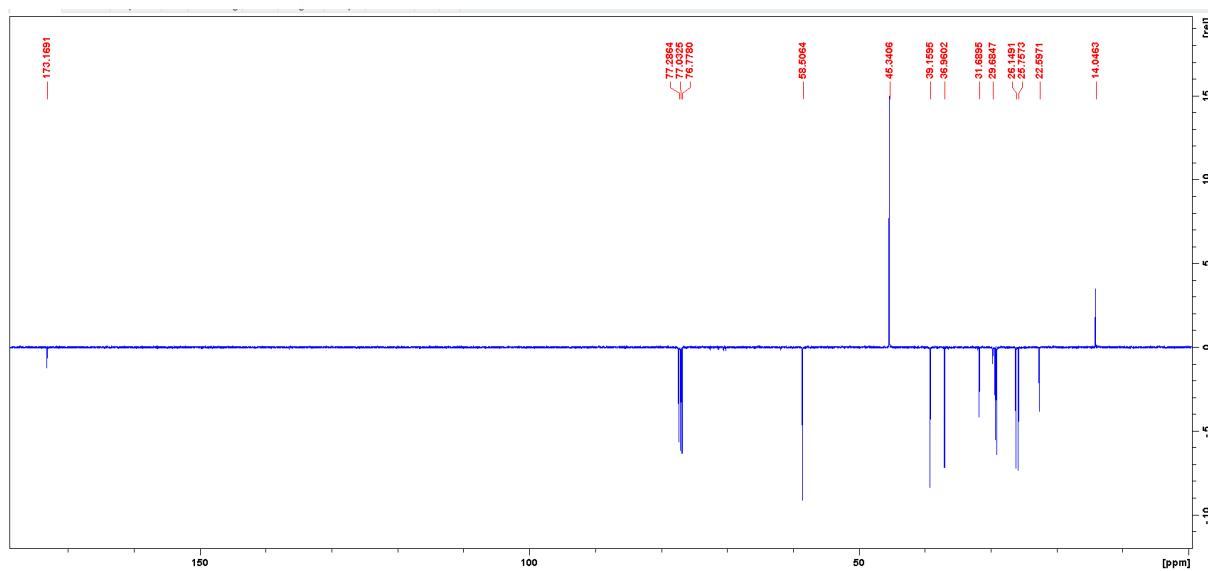

**Figure S50.** APT NMR spectrum of *N*-(3-(dimethylamino)propyl)octanamide (**36**) measured in Chloroform-d, 99.8 atom % D at 296 K.

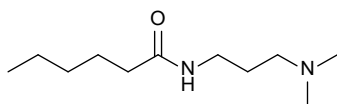

*N*-(3-(dimethylamino)propyl)hexanamide (**37**)

The compound is obtained as a yellowish oil in 95% yield (175.0 mg, 0.874 mmol).

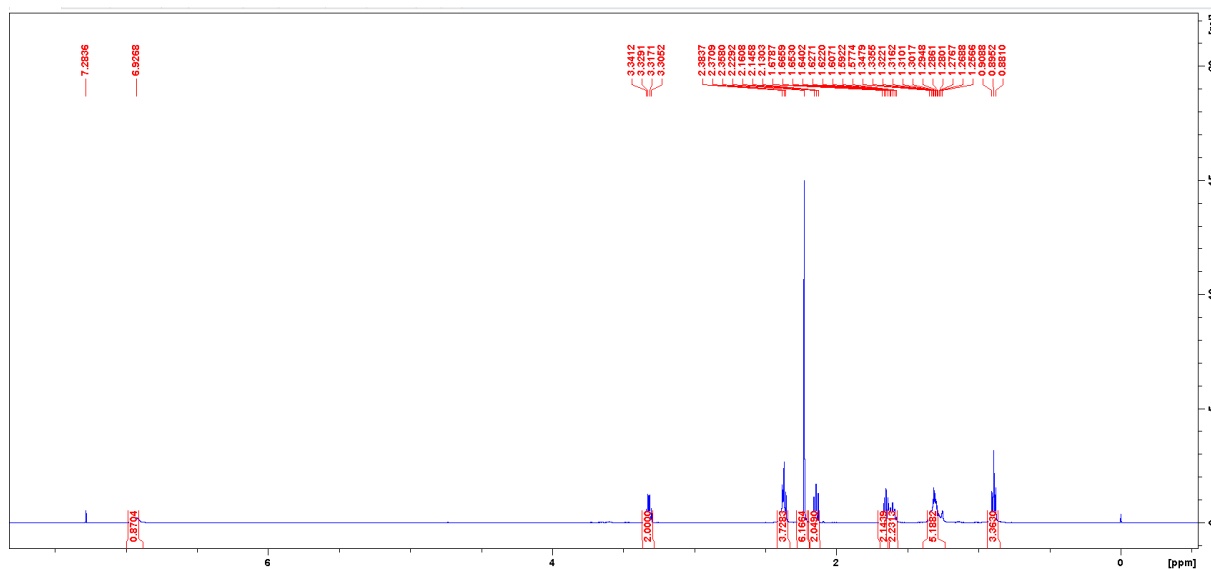

**Figure S51.** <sup>1</sup>H NMR spectrum of *N*-(3-(dimethylamino)propyl)hexanamide (**37**) measured in Chloroform-d, 99.8 atom % D at 296 K.

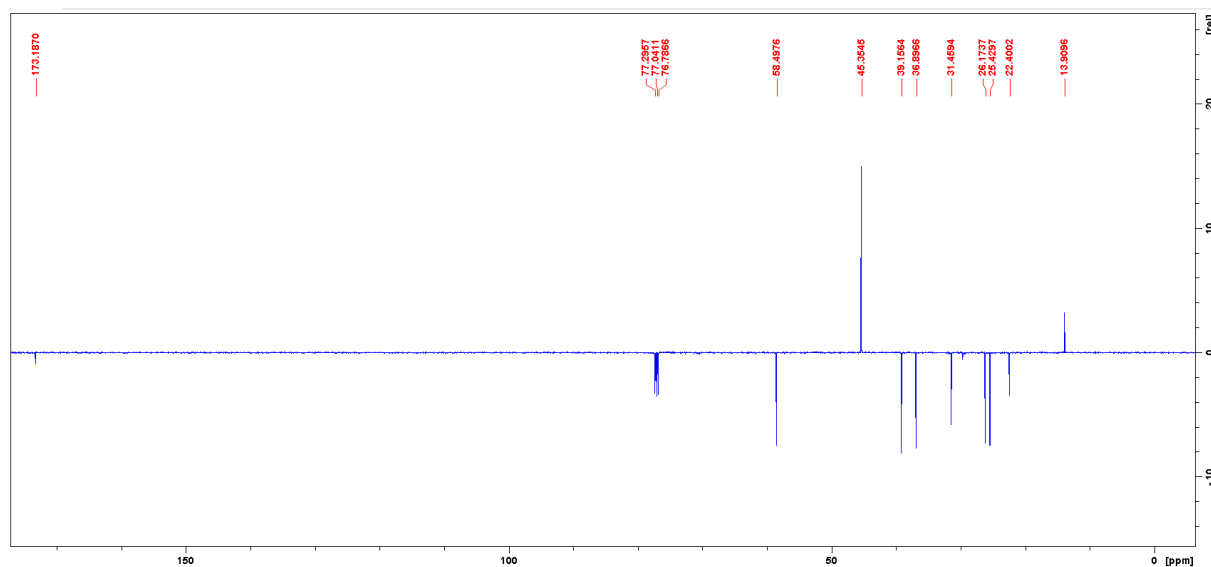

**Figure S52.** APT NMR spectrum of *N*-(3-(dimethylamino)propyl)hexanamide (**37**) measured in Chloroform-d, 99.8 atom % D at 296 K.

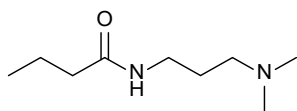

*N*-(3-(dimethylamino)propyl)butyramide (**38**)

The compound is obtained as a colorless oil in 90% yield (142.6 mg, 0.828 mmol).

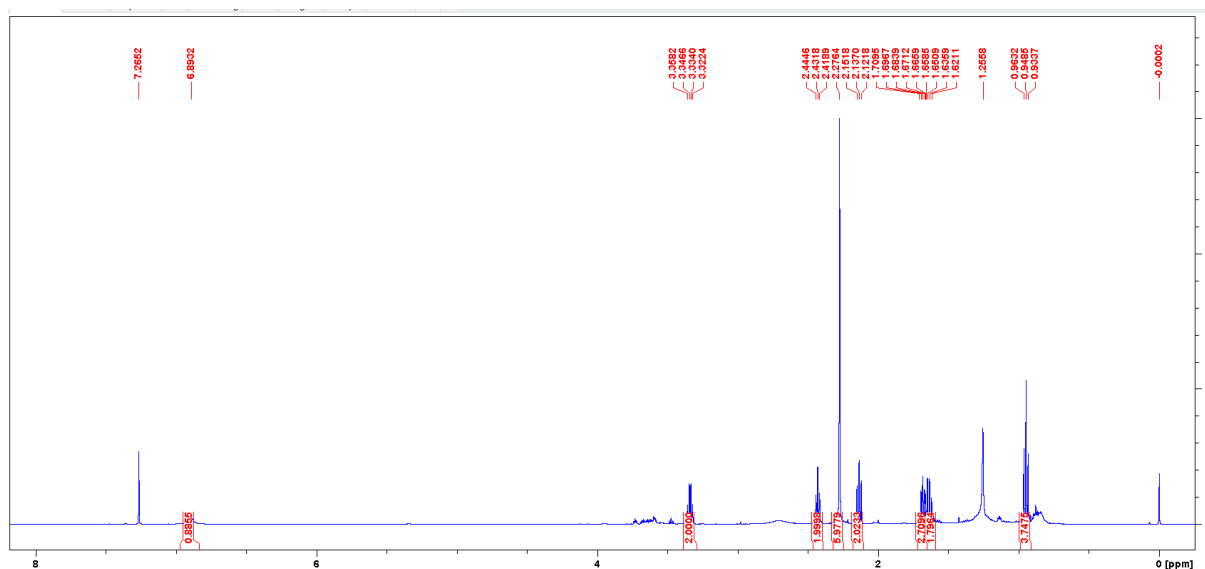

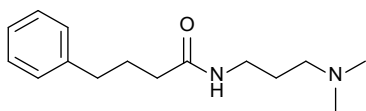

*N*-(3-(dimethylamino)propyl)-4-phenylbutanamide (**39**)

The compound is obtained as a yellowish oil in 95% yield (217.0 mg, 0.874 mmol).

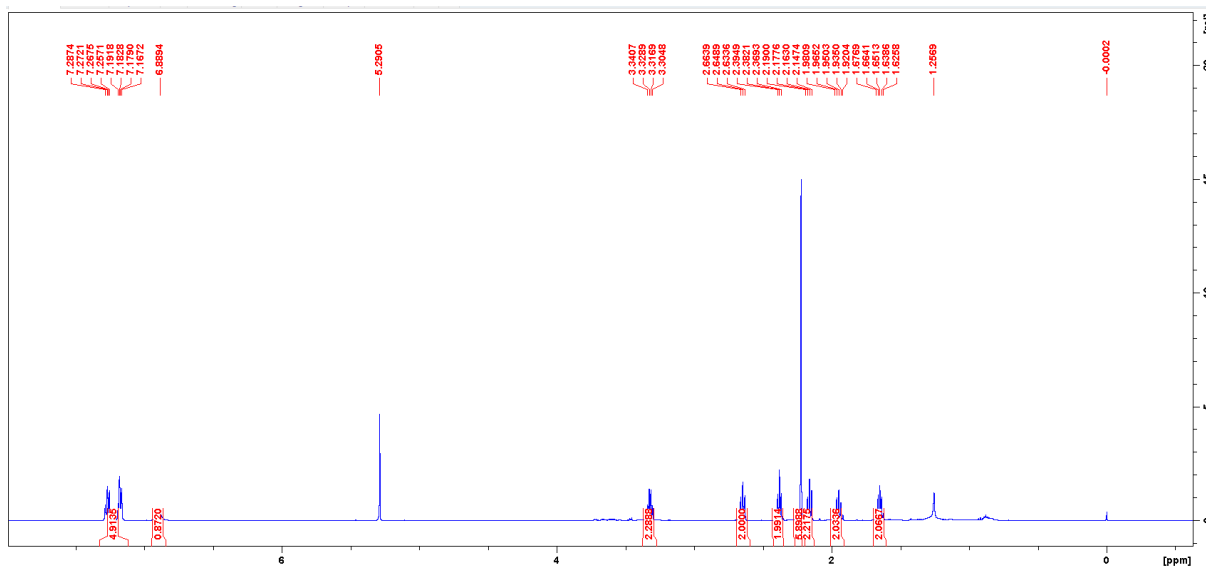

**Figure S55.**  $^1\text{H}$  NMR spectrum of *N*-(3-(dimethylamino)propyl)-4-phenylbutanamide (**39**) measured in Chloroform- $d$ , 99.8 atom % D at 296 K.

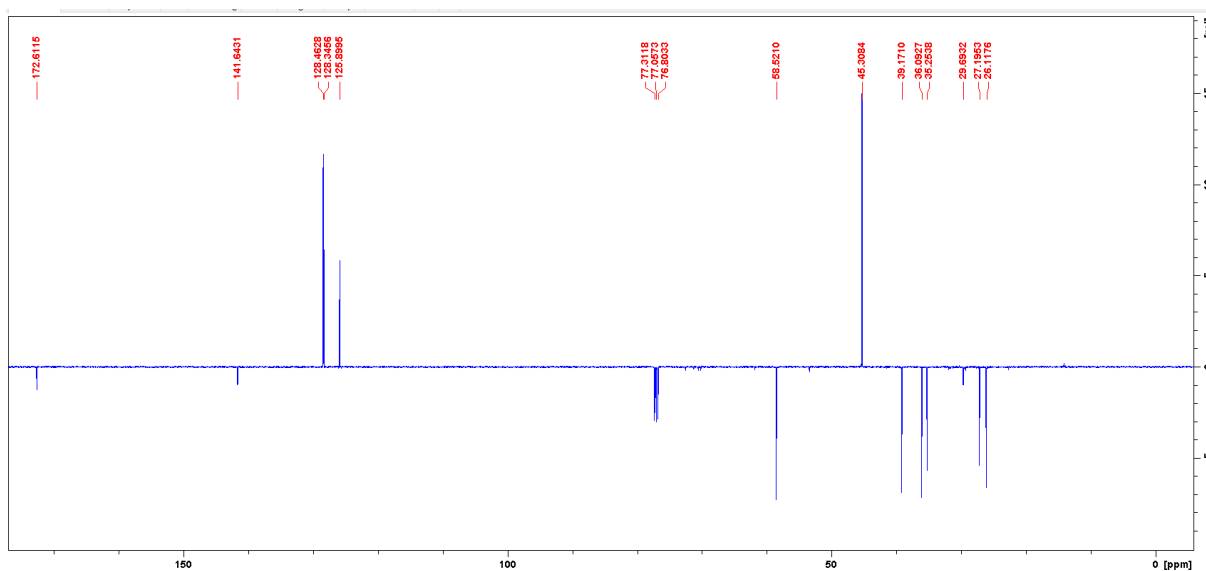

**Figure S56.**  $^{13}\text{C}$  NMR spectrum of *N*-(3-(dimethylamino)propyl)-4-phenylbutanamide (**39**) measured in Chloroform- $d$ , 99.8 atom % D at 296 K.

## 2. GC-MS measurement

In a screw-capped tube are successively introduced the amine (1 equiv), the acid (1 equiv) dissolved in 1 mL toluene solvent to provide a 42 mM solution. Concentration of immobilized CALB was 50 mg/mL for the above mentioned reasons. The reaction was carried out with 50 mg 3Å size molecular sieves and also 2 µl *n*-heptadecane as an analytical standard was added in the reaction mixture. 15 µl samples were taken every 10 minutes for 30 minutes.

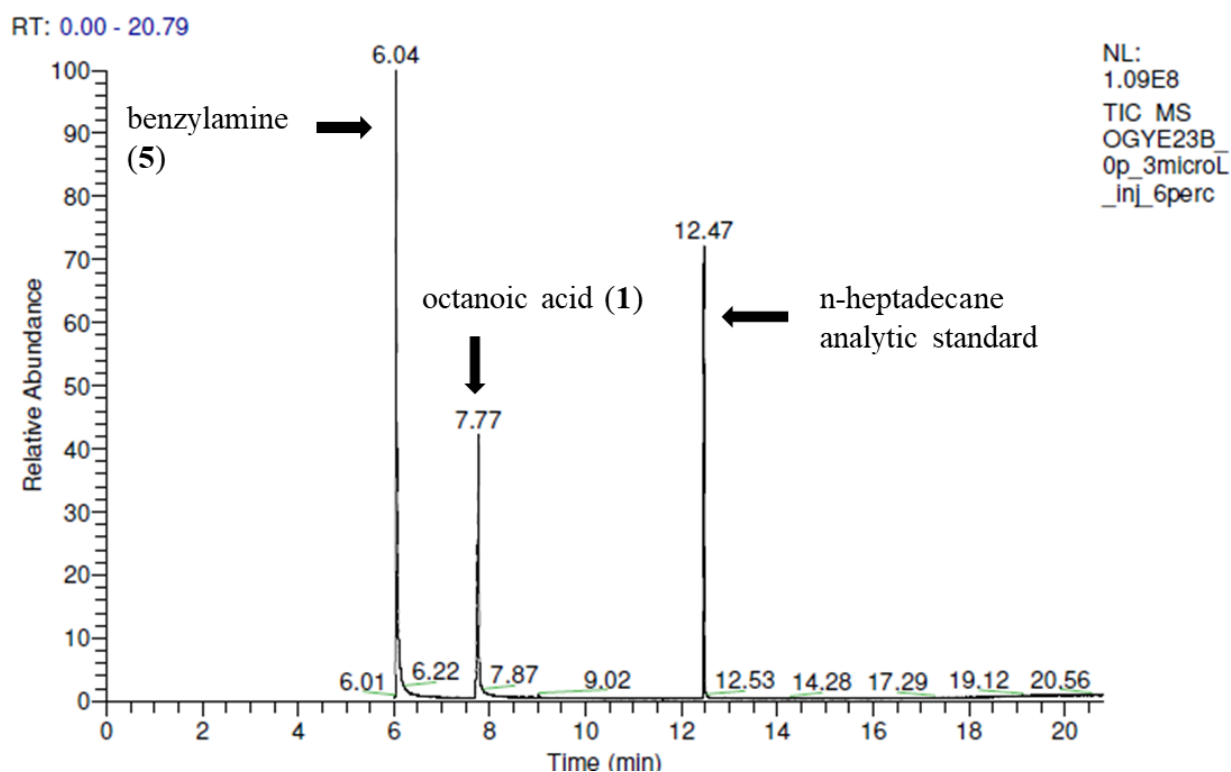

**Figure S57** Total ion chromatogram of the sample of reaction mixture at the zero time by GC-MS.

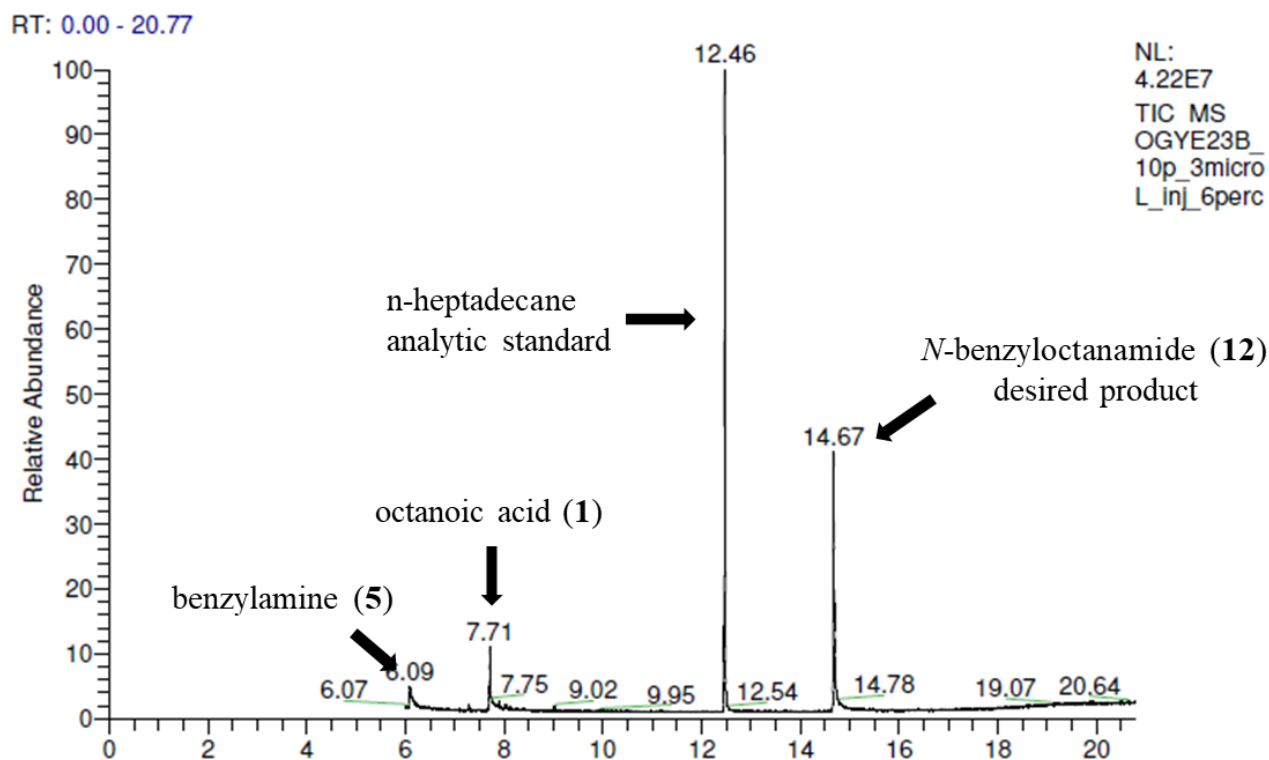

**Figure S58.** Total ion chromatogram of the sample of reaction mixture at the 10 minutes by GC-MS.

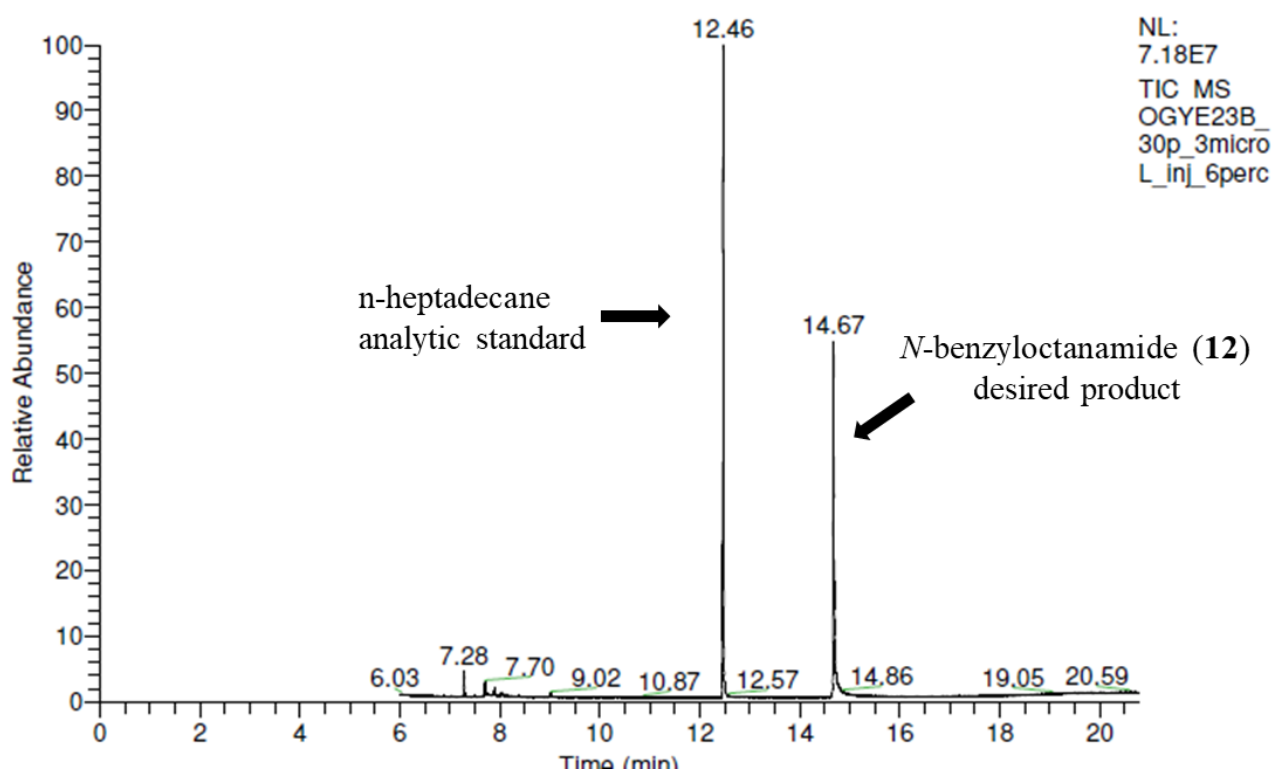

**Figure S59.** Total ion chromatogram of the sample of reaction mixture at the 30 minutes by GC-MS.

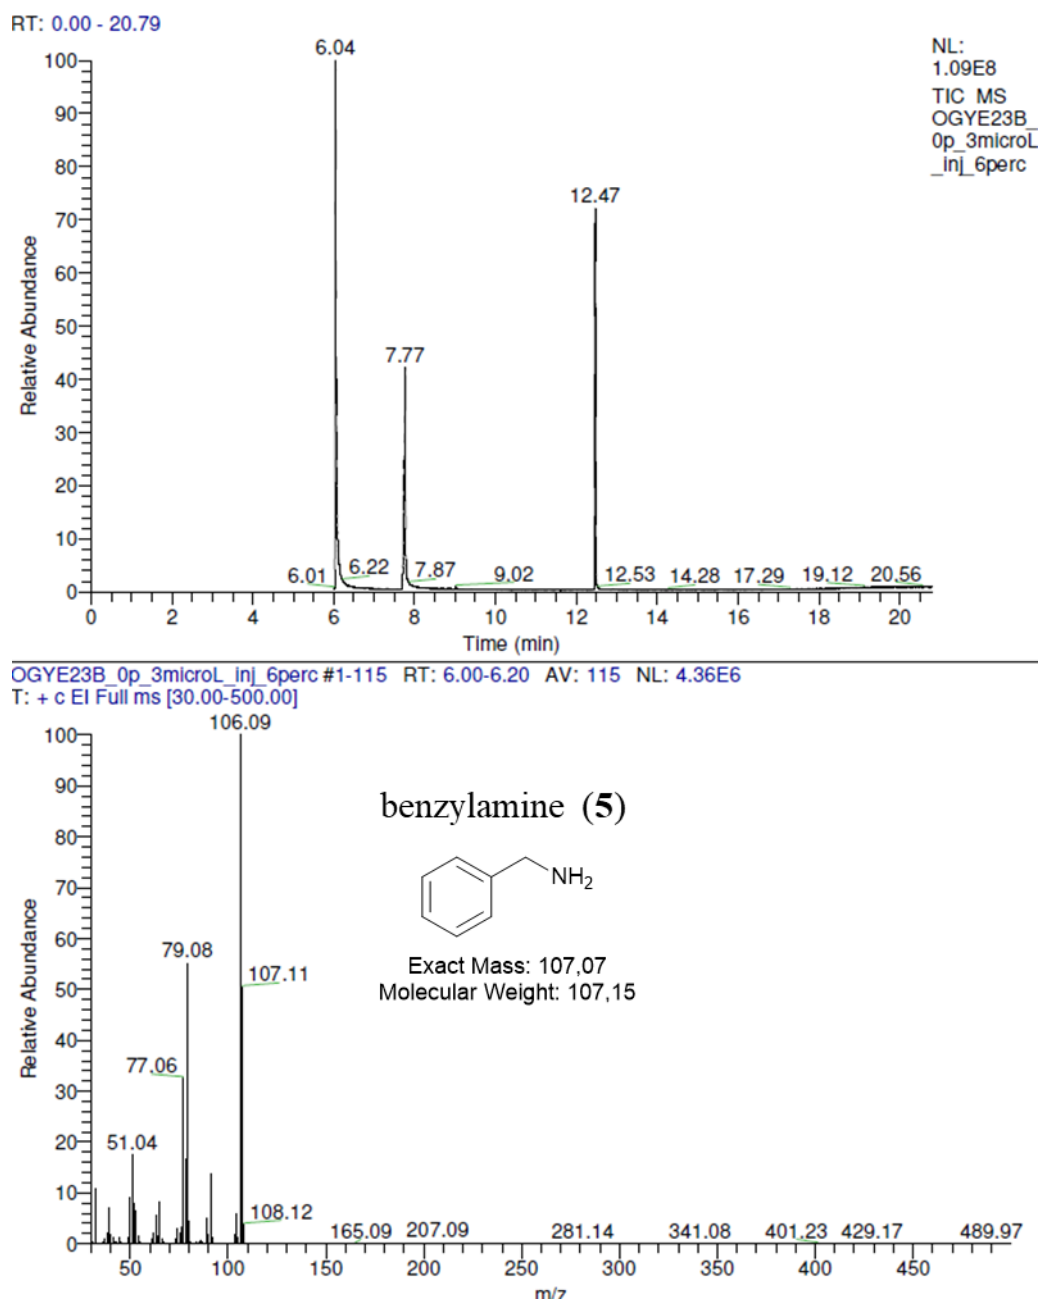

**Figure S60.** GC-MS spectrum of benzylamine (**5**) substrate.



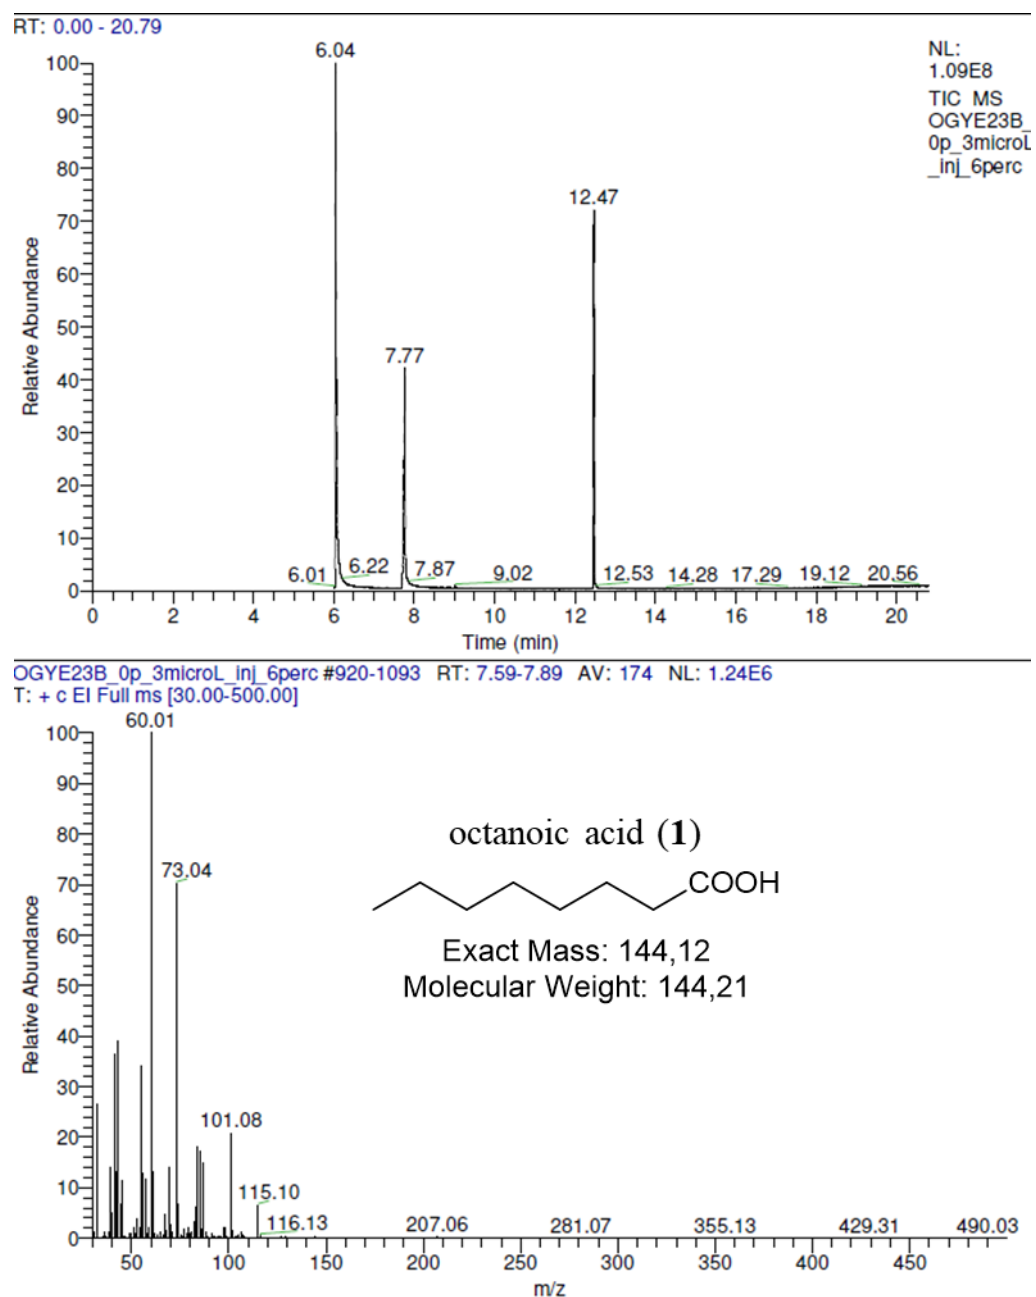

**Figure S61.** GC-MS spectrum of octanoic acid (1) substrate.

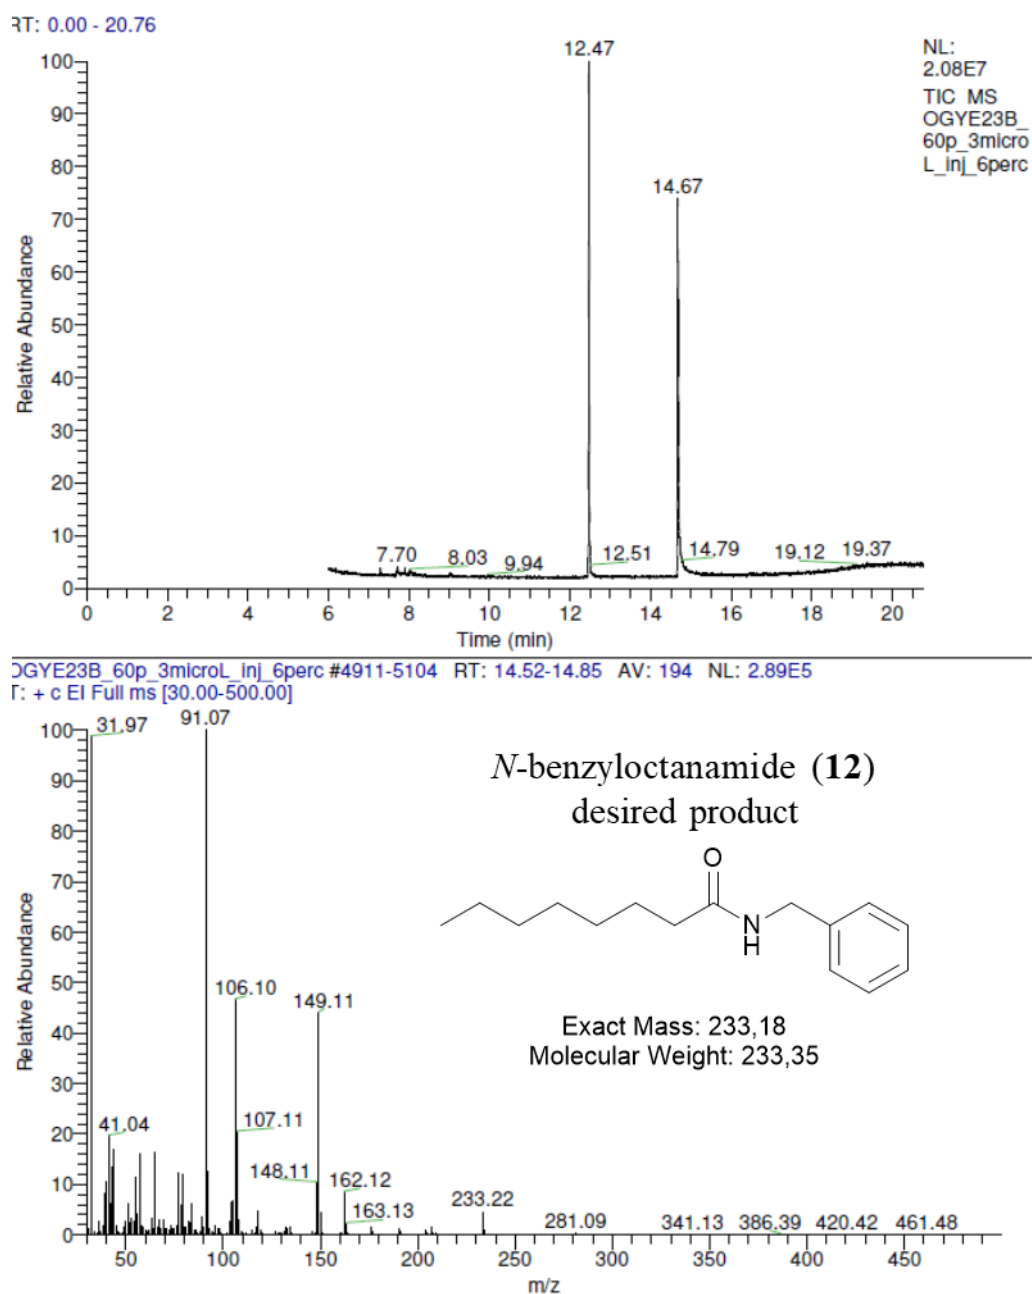

**Figure S62.** GC-MS spectrum of *N*-benzyloctanamide (12) product.
